# Supplementary material for: Fingolimod induces neuronal-specific gene expression with potential neuroprotective outcomes in maturing neuronal progenitor cells exposed to HIV
Source: Springer Nature journal article supplement (doi:10.1007/s13365-017-0571-7), 2017-09-14
Supplement: MOESM1 [file 15059170]

Fig. S1 Study design and experimental flow

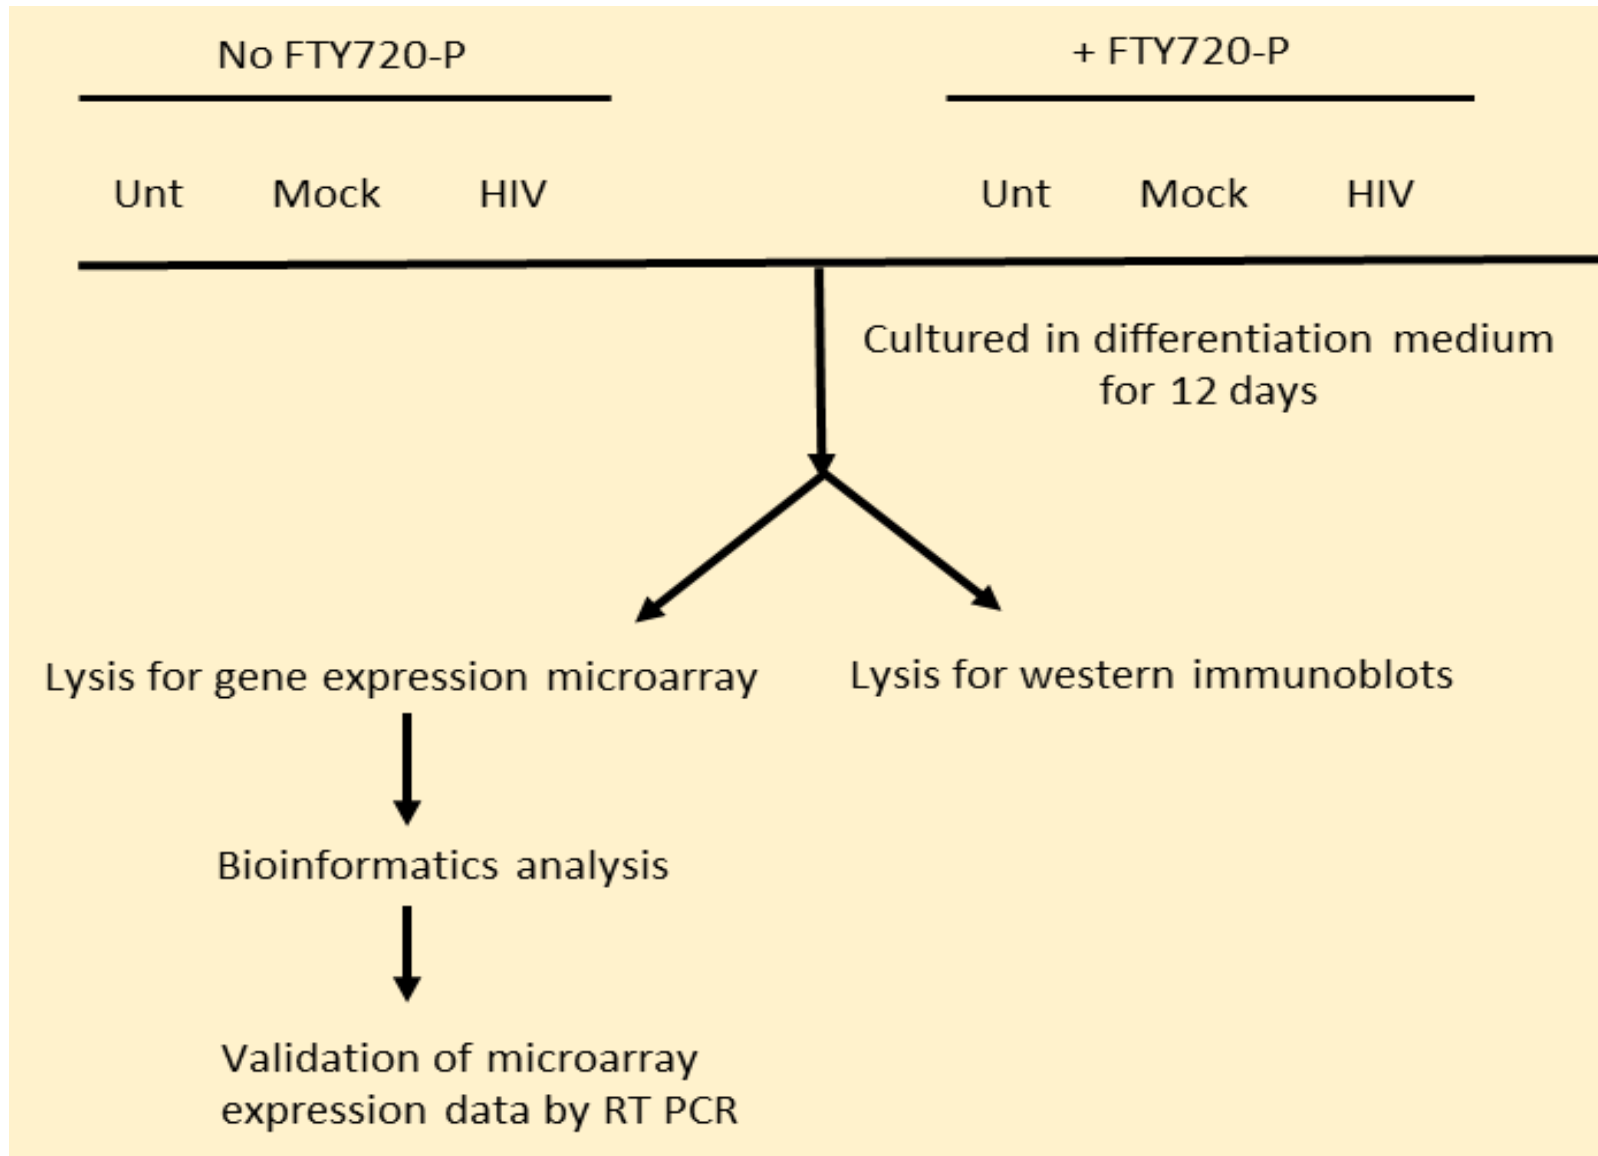

**Table S1 Differentially expressed genes in pairwise comparisons of Mock vs Unt, HIV vs Unt and HIV vs Mock, in the absence of FTY720-P**

NOTE: For all the analyses, repeated probes, non coding RNA, withdrawn genes and pseudogenes were removed

Expression values for antisense RNA, and for uncharacterized genes were kept

**FC absolute value  $\geq$  1.5 and nominal p value  $\leq$  0.05**

| Mock vs Unt - No FTY720-P |             |                 | HIV vs Unt - No FTY720-P |          |                 | HIV vs Mock - No FTY720-P |          |                 | Unique to   | Unique to HIV vs | Common    |
|---------------------------|-------------|-----------------|--------------------------|----------|-----------------|---------------------------|----------|-----------------|-------------|------------------|-----------|
| Gene                      | Fold Change | Nominal p value | Gene                     | FC value | Nominal p value | Gene                      | FC value | Nominal p value | Mock vs Unt | Unt              | to both   |
| A2M                       | 6.5396      | 0               | A2M                      | 6.7048   | 0.0105          | B2M                       | 1.7648   | 0.0101          | ADA         | BHLHE22          | A2M       |
| ADA                       | 1.5569      | 0.0037          | AGTPBP1                  | 1.5352   | 0.0485          | HLA-A                     | 1.8762   | 0.0008          | ADM         | CNTNAP1          | AGTPBP1   |
| ADM                       | 3.2333      | 0.011           | ALPK2                    | 5.849    | 0.0052          | HLA-A29.1                 | 1.5317   | 0.0138          | ALDOC       | D4S234E          | ALPK2     |
| AGTPBP1                   | 1.573       | 0.0061          | ARHGEF6                  | -1.5094  | 0.0334          | HLA-B                     | 2.3674   | 0.0008          | ANGPT1      | ELAVL2           | ARHGEF6   |
| ALDOC                     | 2.1583      | 0.0442          | B2M                      | 7.1211   | 0.0002          | HLA-E                     | 1.577    | 0.022           | ANKRD20A1   | HLA-F            | B2M       |
| ALPK2                     | 5.0277      | 0.0011          | BCAT1                    | 1.73     | 0.0003          | HLA-F                     | 1.6636   | 0.0045          | ANKRD37     | HS.551307        | BCAT1     |
| ANGPT1                    | -1.6337     | 0.0015          | BCL6                     | 1.5148   | 0.0078          | PSMB8                     | 1.5266   | 0.0061          | ARL16       | JAG1             | BCL6      |
| ANKRD20A1                 | -1.6495     | 0.0113          | BHLHE22                  | -1.7009  | 0.0328          | PSMB9                     | 2.1464   | 0.0491          | ASGR1       | LOC100008589     | C1QTNF6   |
| ANKRD37                   | 1.5049      | 0.027           | C1QTNF6                  | 1.763    | 0.0006          | TAP1                      | 3.146    | 0.0161          | BAALC       | LOC645323        | C21ORF62  |
| ARHGEF6                   | -1.6235     | 0.0303          | C21ORF62                 | 1.5419   | 0.0022          |                           |          |                 | BCL3        | LOC653111        | CAPN5     |
| ARL16                     | -1.5803     | 0.0193          | CAPN5                    | 1.5516   | 0.002           |                           |          |                 | BHLHB2      | NBPF20           | COL1A2    |
| ASGR1                     | 1.6872      | 0.0088          | CNTNAP1                  | 1.5086   | 0.0152          |                           |          |                 | BLZF1       | PCDH18           | CXCR7     |
| B2M                       | 4.0348      | 0.0001          | COL1A2                   | 1.511    | 0.0099          |                           |          |                 | C21ORF24    | PSMB8            | EFR3A     |
| BAALC                     | 1.5232      | 0               | CXCR7                    | 1.6421   | 0.0136          |                           |          |                 | C2ORF80     | PSMB9            | ELMOD1    |
| BCAT1                     | 1.5627      | 0.0004          | D4S234E                  | -1.5103  | 0.0266          |                           |          |                 | C9ORF80     | PSME1            | EPHA4     |
| BCL3                      | 1.6435      | 0.0011          | EFR3A                    | 1.5448   | 0.0282          |                           |          |                 | CCDC125     | PTRF             | FAM167A   |
| BCL6                      | 1.6557      | 0.0001          | ELAVL2                   | -1.6194  | 0.0252          |                           |          |                 | CCND1       | SOX9             | FAM46A    |
| BHLHB2                    | 2.0881      | 0.0176          | ELMOD1                   | 2.9402   | 0.0014          |                           |          |                 | CD44        | SP8              | FLRT3     |
| BLZF1                     | -1.5698     | 0.0067          | EPHA4                    | -1.6583  | 0.0081          |                           |          |                 | CDK6        | TNFRSF1A         | FMN2      |
| C1QTNF6                   | 2.1006      | 0.0002          | FAM167A                  | 3.563    | 0.0001          |                           |          |                 | CDKN1A      |                  | FXYD5     |
| C21ORF24                  | -1.6234     | 0.0236          | FAM46A                   | 3.0055   | 0.0073          |                           |          |                 | CEBPD       |                  | GYG2      |
| C21ORF62                  | 1.5688      | 0.0172          | FLRT3                    | -1.9597  | 0.0243          |                           |          |                 | CRCP        |                  | HLA-A     |
| C2ORF80                   | 1.6621      | 0.0058          | FMN2                     | 1.5284   | 0.0004          |                           |          |                 | CRY1        |                  | HLA-A29.1 |
| C9ORF80                   | -1.5568     | 0.0182          | FXYD5                    | 1.5858   | 0.0009          |                           |          |                 | CSF2RA      |                  | HLA-B     |
| CAPN5                     | 1.5823      | 0.0055          | GYG2                     | 2.2503   | 0.0142          |                           |          |                 | DACT2       |                  | HLA-E     |
| CCDC125                   | -1.5449     | 0.025           | HLA-A                    | 3.2445   | 0.0001          |                           |          |                 | DDIT4       |                  | HS.489254 |
| CCND1                     | -1.6254     | 0.0055          | HLA-A29.1                | 2.5003   | 0.002           |                           |          |                 | DEM1        |                  | HS3ST3A1  |
| CD44                      | 1.5417      | 0.0122          | HLA-B                    | 3.6293   | 0.0001          |                           |          |                 | DMC1        |                  | HSPE1     |
| CDK6                      | -1.5816     | 0.0035          | HLA-E                    | 2.501    | 0.0045          |                           |          |                 | EID2B       |                  | HTRA1     |
| CDKN1A                    | -1.5259     | 0.0256          | HLA-F                    | 2.4328   | 0.0006          |                           |          |                 | ENO1        |                  | IFI6      |
| CEBPD                     | 1.5086      | 0.0466          | HS.489254                | 1.7366   | 0.0131          |                           |          |                 | FABP5       |                  | IFITM1    |
| COL1A2                    | 1.5923      | 0.0163          | HS.551307                | -1.581   | 0.0228          |                           |          |                 | FAM162A     |                  | IFITM2    |
| CRCP                      | -2.024      | 0.0165          | HS3ST3A1                 | 1.8762   | 0.0089          |                           |          |                 | FLJ44124    |                  | IFITM3    |
| CRY1                      | 1.5564      | 0.0033          | HSPE1                    | 1.8864   | 0.0465          |                           |          |                 | FRAS1       |                  | IGFBP5    |
| CSF2RA                    | -1.6185     | 0.0059          | HTRA1                    | 2.2216   | 0.001           |                           |          |                 | GJA1        |                  | IL13RA1   |
| CXCR7                     | 1.8378      | 0.0002          | IFI6                     | 1.5658   | 0.0162          |                           |          |                 | GRM3        |                  | IRF1      |

|           |         |        |              |         |        |              |              |
|-----------|---------|--------|--------------|---------|--------|--------------|--------------|
| DACT2     | 1.5502  | 0.0013 | IFITM1       | 4.1549  | 0.0032 | HK2          | IRF9         |
| DDIT4     | 1.6928  | 0.0319 | IFITM2       | 2.6421  | 0.0002 | HRASLS3      | ISG15        |
| DEM1      | -1.5079 | 0.0198 | IFITM3       | 3.5539  | 0.0031 | HSPB1        | KBTBD8       |
| DMC1      | -1.5026 | 0.038  | IGFBP5       | 1.8596  | 0.0084 | ID3          | KCNIP4       |
| EFR3A     | 1.5259  | 0.0368 | IL13RA1      | 1.828   | 0.0015 | IDH1         | LARGE        |
| EID2B     | -1.7017 | 0.0326 | IRF1         | 2.5481  | 0.0126 | IFI16        | LEF1         |
| ELMOD1    | 3.5279  | 0.0006 | IRF9         | 3.2923  | 0.001  | IGDCC4       | LGALS3BP     |
| ENO1      | 1.6816  | 0.0361 | ISG15        | 2.749   | 0.005  | IGFBP2       | LOC100134006 |
| EPHA4     | -1.5661 | 0.0101 | JAG1         | -1.5323 | 0.0333 | LDHA         | LOC399939    |
| FABP5     | 1.6688  | 0.0137 | KBTBD8       | 1.7438  | 0.0001 | LILRB1       | LOC729384    |
| FAM162A   | 1.6151  | 0.0098 | KCNIP4       | 5.4885  | 0      | LOC100132727 | MEGF10       |
| FAM167A   | 3.6045  | 0      | LARGE        | -1.5354 | 0.0087 | LOC100190938 | NCAM1        |
| FAM46A    | 2.1784  | 0.004  | LEF1         | -1.5422 | 0.0212 | LOC255783    | NEUROG2      |
| FLJ44124  | -1.5686 | 0.016  | LGALS3BP     | 1.8874  | 0.0152 | LOC392437    | NPPC         |
| FLRT3     | -1.6956 | 0.0068 | LOC100008589 | -1.895  | 0.0389 | LOC440934    | PARP9        |
| FMN2      | 1.6251  | 0.017  | LOC100134006 | -1.9366 | 0.0002 | LOC642362    | PCDH17       |
| FRAS1     | -1.5146 | 0.0273 | LOC399939    | -1.7606 | 0.0013 | MAB21L2      | PDE1A        |
| FXYD5     | 1.7013  | 0.001  | LOC645323    | -1.6191 | 0.0214 | MIF          | PEG10        |
| GJA1      | 1.5888  | 0.0275 | LOC653111    | -1.6347 | 0.0148 | MOBKL2B      | PFKP         |
| GRM3      | -1.6711 | 0.0006 | LOC729384    | -1.8293 | 0.0039 | MTP18        | PHCA         |
| GYG2      | 1.92    | 0.0041 | MEGF10       | -1.7874 | 0.0054 | MYCN         | PLEKHA2      |
| HK2       | 1.9563  | 0.0312 | NBPF20       | -1.6205 | 0.0261 | NKX6-2       | PPP1R14C     |
| HLA-A     | 1.7293  | 0.001  | NCAM1        | -1.5629 | 0.0367 | OLFM1        | PRSS23       |
| HLA-A29.1 | 1.6324  | 0.0015 | NEUROG2      | -1.6035 | 0.0016 | P4HA1        | PSRC1        |
| HLA-B     | 1.533   | 0.0031 | NPPC         | -1.7888 | 0.004  | PCDH19       | RALYL        |
| HLA-E     | 1.5859  | 0      | PARP9        | 2.1567  | 0.0229 | PFKFB3       | RBMS1        |
| HRASLS3   | 1.5252  | 0.0042 | PCDH17       | -1.6178 | 0.0245 | PGAM1        | RHOBTB3      |
| HS.489254 | 1.6389  | 0.0228 | PCDH18       | -1.5651 | 0.0341 | PGAM4        | RND3         |
| HS3ST3A1  | 2.2142  | 0.0089 | PDE1A        | -1.6125 | 0.0119 | PGK1         | SERPINB6     |
| HSPB1     | 1.5511  | 0.0054 | PEG10        | 1.6396  | 0.0269 | PHYHIPL      | SERPING1     |
| HSPE1     | 1.6807  | 0.0378 | PFKP         | 1.8191  | 0.0024 | PI15         | SHISA2       |
| HTRA1     | 2.6796  | 0.0002 | PHCA         | 1.7252  | 0.0071 | PLOD2        | SLC2A3       |
| ID3       | 1.689   | 0.0164 | PLEKHA2      | 1.9844  | 0.0007 | PLXDC2       | SMAD6        |
| IDH1      | 1.6271  | 0.0181 | PPP1R14C     | 1.8848  | 0.0007 | PPP1R3C      | SNCAIP       |
| IFI16     | 1.5495  | 0.0029 | PRSS23       | 1.9409  | 0.0022 | PPP2R2B      | SOCS3        |
| IFI6      | 1.5634  | 0.023  | PSMB8        | 1.7666  | 0.0056 | PRPH         | SOSTDC1      |
| IFITM1    | 4.7562  | 0.0002 | PSMB9        | 2.4671  | 0.0367 | PTPRD        | SPAG16       |
| IFITM2    | 2.8637  | 0.0009 | PSME1        | 1.5176  | 0.0172 | RARRES2      | SPRYD5       |
| IFITM3    | 3.7441  | 0.0053 | PSRC1        | 2.0754  | 0.0144 | RAXL1        | SRGAP3       |
| IGDCC4    | 1.5495  | 0.0011 | PTRF         | 1.8483  | 0.0393 | SFRP1        | STAT1        |
| IGFBP2    | 1.654   | 0.0084 | RALYL        | 1.5671  | 0.0009 | SORT1        | SULF1        |
| IGFBP5    | 1.9491  | 0.0014 | RBMS1        | 1.8964  | 0.0028 | SOX3         | TAP1         |
| IL13RA1   | 2.0309  | 0.0001 | RHOBTB3      | 1.8253  | 0.0018 | SYT7         | TMEM158      |
| IRF1      | 1.693   | 0.0012 | RND3         | -1.6701 | 0.0004 | TMEFF2       | TPST2        |

|              |         |        |          |         |        |        |         |
|--------------|---------|--------|----------|---------|--------|--------|---------|
| IRF9         | 2.2178  | 0.0011 | SERPINB6 | 2.0581  | 0.0001 | TPI1   | TRIM48  |
| ISG15        | 2.1556  | 0.0034 | SERPING1 | 1.5913  | 0.011  | VGLL3  | TSPO    |
| KBTBD8       | 1.9122  | 0.0041 | SHISA2   | -1.6341 | 0.0259 | ZNF738 | VGF     |
| KCNIP4       | 7.1305  | 0.0003 | SLC2A3   | 2.4483  | 0.0443 |        | ZC3HAV1 |
| LARGE        | -1.5554 | 0.0045 | SMAD6    | 1.687   | 0.0016 |        |         |
| LDHA         | 1.6507  | 0.0246 | SNCAIP   | -1.8056 | 0.0003 |        |         |
| LEF1         | -1.5494 | 0.0335 | SOCS3    | 1.8648  | 0.0072 |        |         |
| LGALS3BP     | 1.8316  | 0.0024 | SOSTDC1  | 1.6706  | 0.0085 |        |         |
| LILRB1       | -1.5039 | 0.0106 | SOX9     | -1.591  | 0.0105 |        |         |
| LOC100132727 | -1.5189 | 0.0483 | SP8      | -1.5219 | 0.017  |        |         |
| LOC100134006 | -1.8955 | 0.0044 | SPAG16   | -1.6269 | 0.0128 |        |         |
| LOC100190938 | -1.5672 | 0.0128 | SPRYD5   | -2.0677 | 0.0085 |        |         |
| LOC255783    | 1.584   | 0.0004 | SRGAP3   | -1.5117 | 0.0215 |        |         |
| LOC392437    | 1.6667  | 0.0076 | STAT1    | 3.624   | 0.024  |        |         |
| LOC399939    | -1.6837 | 0.0036 | SULF1    | 1.7949  | 0.0128 |        |         |
| LOC440934    | -1.6835 | 0.0098 | TAP1     | 6.6548  | 0.0067 |        |         |
| LOC642362    | -1.6812 | 0.005  | TMEM158  | 3.8987  | 0.0096 |        |         |
| LOC729384    | -1.5939 | 0.0019 | TNFRSF1A | 1.5     | 0.0003 |        |         |
| MAB21L2      | -1.6019 | 0.0236 | TPST2    | 1.5372  | 0.004  |        |         |
| MEGF10       | -1.7371 | 0.0024 | TRIM48   | -2.3047 | 0.0069 |        |         |
| MIF          | 1.7649  | 0.0076 | TSPO     | 1.5605  | 0.015  |        |         |
| MOBK2B       | 1.654   | 0.0004 | VGF      | 2.2278  | 0.0319 |        |         |
| MTP18        | 1.884   | 0.0005 | ZC3HAV1  | 2.2043  | 0.0005 |        |         |
| MYCN         | 1.5914  | 0.0056 |          |         |        |        |         |
| NCAM1        | -1.5475 | 0.0105 |          |         |        |        |         |
| NEUROG2      | -1.6098 | 0.0031 |          |         |        |        |         |
| NKX6-2       | 2.4054  | 0.001  |          |         |        |        |         |
| NPPC         | -2.0614 | 0.0024 |          |         |        |        |         |
| OLFM1        | -1.5055 | 0.0331 |          |         |        |        |         |
| P4HA1        | 1.9163  | 0.0362 |          |         |        |        |         |
| PARP9        | 1.7401  | 0.0042 |          |         |        |        |         |
| PCDH17       | -1.8137 | 0.0018 |          |         |        |        |         |
| PCDH19       | -1.6199 | 0.0058 |          |         |        |        |         |
| PDE1A        | -1.6874 | 0.0302 |          |         |        |        |         |
| PEG10        | 1.7976  | 0.0139 |          |         |        |        |         |
| PFKFB3       | 1.5656  | 0.0169 |          |         |        |        |         |
| PFKP         | 1.5641  | 0.0091 |          |         |        |        |         |
| PGAM1        | 2.1598  | 0.0152 |          |         |        |        |         |
| PGAM4        | 1.6115  | 0.0149 |          |         |        |        |         |
| PGK1         | 1.6237  | 0.0242 |          |         |        |        |         |
| PHCA         | 1.5845  | 0.012  |          |         |        |        |         |
| PHYHIPL      | -1.5425 | 0.002  |          |         |        |        |         |
| PI15         | -1.5808 | 0.0015 |          |         |        |        |         |
| PLEKHA2      | 2.3799  | 0.0033 |          |         |        |        |         |

|          |         |        |
|----------|---------|--------|
| PLOD2    | 1.9843  | 0.0334 |
| PLXDC2   | 1.6449  | 0.0004 |
| PPP1R14C | 2.2475  | 0.0136 |
| PPP1R3C  | 1.5195  | 0.0101 |
| PPP2R2B  | 1.5236  | 0.0048 |
| PRPH     | 2.0654  | 0.047  |
| PRSS23   | 2.3574  | 0.0051 |
| PSRC1    | 2.191   | 0.0099 |
| PTPRD    | -1.6159 | 0.0141 |
| RALYL    | 1.8613  | 0.003  |
| RARRES2  | 1.538   | 0.0034 |
| RAXL1    | -1.5017 | 0.0312 |
| RBMS1    | 1.9471  | 0.0004 |
| RHOBTB3  | 1.5868  | 0.0014 |
| RND3     | -2.0557 | 0.0013 |
| SERPINB6 | 2.3447  | 0.0001 |
| SERPING1 | 1.7213  | 0.0016 |
| SFRP1    | 1.5198  | 0.0057 |
| SHISA2   | -1.6113 | 0.0028 |
| SLC2A3   | 3.3889  | 0.0019 |
| SMAD6    | 1.6698  | 0.0074 |
| SNCAIP   | -1.8788 | 0.0039 |
| SOCS3    | 1.9355  | 0.0001 |
| SORT1    | 1.5491  | 0.001  |
| SOSTDC1  | 1.8693  | 0.0007 |
| SOX3     | -1.5166 | 0.0227 |
| SPAG16   | -1.591  | 0.0046 |
| SPRYD5   | -1.8818 | 0.0075 |
| SRGAP3   | -1.5008 | 0.0238 |
| STAT1    | 2.0168  | 0.0004 |
| SULF1    | 2.0796  | 0.0016 |
| SYT7     | 1.5429  | 0.0188 |
| TAP1     | 2.1155  | 0      |
| TMEFF2   | -1.5376 | 0.0015 |
| TMEM158  | 3.4331  | 0.0001 |
| TPI1     | 1.5307  | 0.0182 |
| TPST2    | 1.8181  | 0.0049 |
| TRIM48   | -1.8975 | 0.0006 |
| TSPO     | 1.5288  | 0.0073 |
| VGf      | 1.5804  | 0.0265 |
| VGLL3    | -1.7053 | 0.0125 |
| ZC3HAV1  | 2.0697  | 0.0007 |
| ZNF738   | -1.5013 | 0.0403 |

**Table S2 Differentially expressed genes in pairwise comparisons of Mock vs Unt and HIV vs Unt in the absence of FTY720-P**

NOTE: For all the analyses, repeated probes, non coding RNA, withdrawn genes and pseudogenes were removed

Expression values for antisense RNA, and for uncharacterized genes were kept

**FC absolute value  $\geq$  2.0 and nominal p value  $\leq$  0.05**

| Mock vs Unt no FTY720-P |          |                 | HIV vs Unt no FTY720-P |          |                 | Unique to Mock | Unique to HIV | Common to both |
|-------------------------|----------|-----------------|------------------------|----------|-----------------|----------------|---------------|----------------|
| Gene                    | FC value | Nominal p value | Gene                   | FC value | Nominal p value |                |               |                |
| KCNIP4                  | 7.1305   | 0.0003          | B2M                    | 7.1211   | 0.0002          | ADM            | HLA-B         | KCNIP4         |
| A2M                     | 6.5396   | 0               | A2M                    | 6.7048   | 0.0105          | NKX6-2         | HLA-A         | A2M            |
| ALPK2                   | 5.0277   | 0.0011          | TAP1                   | 6.6548   | 0.0067          | PLEKHA2        | IRF1          | ALPK2          |
| IFITM1                  | 4.7562   | 0.0002          | ALPK2                  | 5.849    | 0.0052          | PRSS23         | HLA-E         | IFITM1         |
| B2M                     | 4.0348   | 0.0001          | KCNIP4                 | 5.4885   | 0               | PPP1R14C       | HLA-A29.1     | B2M            |
| IFITM3                  | 3.7441   | 0.0053          | IFITM1                 | 4.1549   | 0.0032          | HS3ST3A1       | PSMB9         | IFITM3         |
| FAM167A                 | 3.6045   | 0               | TMEM158                | 3.8987   | 0.0096          | PGAM1          | HLA-F         | FAM167A        |
| ELMOD1                  | 3.5279   | 0.0006          | HLA-B                  | 3.6293   | 0.0001          | ALDOC          | GYG2          | ELMOD1         |
| TMEM158                 | 3.4331   | 0.0001          | STAT1                  | 3.624    | 0.024           | C1QTNF6        | VGf           | TMEM158        |
| SLC2A3                  | 3.3889   | 0.0019          | FAM167A                | 3.563    | 0.0001          | BHLHB2         | PARP9         | SLC2A3         |
| ADM                     | 3.2333   | 0.011           | IFITM3                 | 3.5539   | 0.0031          | SULF1          | SPRYD5        | IFITM2         |
| IFITM2                  | 2.8637   | 0.0009          | IRF9                   | 3.2923   | 0.001           | PRPH           | TRIM48        | HTRA1          |
| HTRA1                   | 2.6796   | 0.0002          | HLA-A                  | 3.2445   | 0.0001          | IL13RA1        |               | SERPINB6       |
| NKX6-2                  | 2.4054   | 0.001           | FAM46A                 | 3.0055   | 0.0073          | CRCP           |               | IRF9           |
| PLEKHA2                 | 2.3799   | 0.0033          | ELMOD1                 | 2.9402   | 0.0014          | RND3           |               | PSRC1          |
| PRSS23                  | 2.3574   | 0.0051          | ISG15                  | 2.749    | 0.005           | NPPC           |               | FAM46A         |
| SERPINB6                | 2.3447   | 0.0001          | IFITM2                 | 2.6421   | 0.0002          |                |               | ISG15          |
| PPP1R14C                | 2.2475   | 0.0136          | IRF1                   | 2.5481   | 0.0126          |                |               | TAP1           |
| IRF9                    | 2.2178   | 0.0011          | HLA-E                  | 2.501    | 0.0045          |                |               | ZC3HAV1        |
| HS3ST3A1                | 2.2142   | 0.0089          | HLA-A29.1              | 2.5003   | 0.002           |                |               | STAT1          |
| PSRC1                   | 2.191    | 0.0099          | PSMB9                  | 2.4671   | 0.0367          |                |               |                |
| FAM46A                  | 2.1784   | 0.004           | SLC2A3                 | 2.4483   | 0.0443          |                |               |                |
| PGAM1                   | 2.1598   | 0.0152          | HLA-F                  | 2.4328   | 0.0006          |                |               |                |
| ALDOC                   | 2.1583   | 0.0442          | GYG2                   | 2.2503   | 0.0142          |                |               |                |
| ISG15                   | 2.1556   | 0.0034          | VGf                    | 2.2278   | 0.0319          |                |               |                |
| TAP1                    | 2.1155   | 0               | HTRA1                  | 2.2216   | 0.001           |                |               |                |

|         |         |        |          |         |        |
|---------|---------|--------|----------|---------|--------|
| C1QTNF6 | 2.1006  | 0.0002 | ZC3HAV1  | 2.2043  | 0.0005 |
| BHLHB2  | 2.0881  | 0.0176 | PARP9    | 2.1567  | 0.0229 |
| SULF1   | 2.0796  | 0.0016 | PSRC1    | 2.0754  | 0.0144 |
| ZC3HAV1 | 2.0697  | 0.0007 | SERPINB6 | 2.0581  | 0.0001 |
| PRPH    | 2.0654  | 0.047  | SPRYD5   | -2.0677 | 0.0085 |
| IL13RA1 | 2.0309  | 0.0001 | TRIM48   | -2.3047 | 0.0069 |
| STAT1   | 2.0168  | 0.0004 |          |         |        |
| CRCP    | -2.024  | 0.0165 |          |         |        |
| RND3    | -2.0557 | 0.0013 |          |         |        |
| NPPC    | -2.0614 | 0.0024 |          |         |        |

**Table S3 Differentially expressed genes in pairwise comparisons of HIV vs Unt: hNP1 cells compared to other published studies of neural cells or brain tissues**  
**FC absolute value  $\geq 2.0$  and nominal p value  $\leq 0.05$**

| Genes differentially expressed in hNP1 | FC value | Name                                                  | Function          | Geffin et. al, NEP    |                       | Roberts et. al. | Masliah et.al. | Borjabad et. al. | Gelman et. al. |              |              |
|----------------------------------------|----------|-------------------------------------------------------|-------------------|-----------------------|-----------------------|-----------------|----------------|------------------|----------------|--------------|--------------|
|                                        |          |                                                       |                   | ApoE3/E3              | ApoE3/E3 and ApoE3/E4 |                 |                |                  | Neo-striatum   | Frontal lobe | White matter |
| B2M                                    | 7.12     | beta-2-microglobulin                                  | Immune response   | U, FC= 1.65, p=0.003  | U, FC=1.67, p=0.00    |                 |                | U                | U              | U            |              |
| A2M                                    | 6.7      | alpha-2-macroglobulin                                 | Metabolism        | NS, FC 1.15, p=0.428  | NS, FC=-1.02, p=0.93  | U               |                |                  |                |              |              |
| TAP1                                   | 6.65     | transporter 1, ATP Binding Cassette                   | Immune response   | U, FC= 2.55, p=0.004  | U, FC=2.37, p=0.00    |                 |                | U                | U              | U            |              |
| ALPK2                                  | 5.85     | alpha kinase 2                                        | Enzyme            | NS, FC=1.45, p=0.061  | U, FC=1.42, p=0.012   |                 |                |                  |                |              |              |
| KCNIP4                                 | 5.49     | potassium voltage-gated channel interacting protein 4 | Neuronal function | NS, FC=1.50, p=0.092  | U, FC=1.51, p=0.007   |                 |                | D                |                |              |              |
| IFITM1                                 | 4.15     | interferon induced transmembrane protein 1            | Immune response   | U, FC=3.66, p=0.014   | U, FC=3.49, p=0.0006  |                 | U              | U                | U              |              |              |
| TMEM158                                | 3.9      | transmembrane protein 158                             | Unknown           | NS, F=1.22, p=0.172   | U, FC=1.18, p=0.034   |                 |                |                  |                |              |              |
| HLA-B                                  | 3.63     | Major Histocompatibility Complex, Class I, B          | Immune response   | U, F=4.27, p=0.000    | U, FC=3.79, p=0.000   |                 |                | U                | U              | U            |              |
| STAT1                                  | 3.62     | Signal transducer and activator of transcription 1    | Immune response   | U, F=2.34, p=0.025    | U, FC=2.0, p=0.0011   |                 | U              | U                | U              | U            |              |
| FAM167A                                | 3.56     | Family with sequence similarity 167 Member A          | Cell signaling    | NS, FC=-1.07, p=0.126 | NS, FC=1.00, p=0.9773 |                 |                |                  |                |              |              |
| IFITM3                                 | 3.55     | interferon induced transmembrane protein 3            | Immune response   | U, FC=2.36, p=0.016   | U, FC=2.57, p=0.0001  |                 | U              | U                | U              |              |              |



|           |      |                                              |                   |                       |                       |  |  |   |   |   |
|-----------|------|----------------------------------------------|-------------------|-----------------------|-----------------------|--|--|---|---|---|
| IRF9      | 3.29 | interferon regulatory factor 9               | Immune response   | U, FC=1.62, p=0.013   | U, FC=1.78, p=0.0001  |  |  |   | U |   |
| HLA-A     | 3.24 | Major Histocompatibility Complex, Class I, A | Immune response   | U, FC=2.06, p=0.022   | U, FC=1.82, p=0.0060  |  |  |   | U | U |
| FAM46A    | 3.01 | Family with sequence similarity 46 Member A  | Enzyme            | NS, FC=1.14, p=0.116  | U, FC 1.13, p=0.0100  |  |  |   | U |   |
| ELMOD1    | 2.94 | ELMO domain containing 1                     | Cell signaling    | NS, FC=1.14, p=0.116  | NS, FC=1.12, p=0.1415 |  |  |   | D | D |
| ISG15     | 2.75 | ISG15 ubiquitin-like modifier                | Immune response   | NS, FC=2.94, p=0.064  | U, FC=3.66, p=0.0002  |  |  | U | U | U |
| IFITM2    | 2.64 | interferon induced transmembrane protein 2   | Immune response   | U, FC=2.51, p=0.016   | U, FC=2.47, p=0.0003  |  |  |   | U |   |
| IRF1      | 2.55 | interferon regulatory factor 1               | Immune response   | U, FC=1.68, p=0.019   | U, FC=1.42, p=0.0111  |  |  |   | U |   |
| HLA-E     | 2.5  | Major Histocompatibility Complex, Class I, E | Immune response   | U, FC=2.34, p=0.002   | U, FC=2.43, p=0.000   |  |  | U | U | U |
| HLA-A29.1 | 2.5  | Major Histocompatibility Complex, Class I, A | Immune response   | U, FC=2.17, p=0.050   | U, FC=1.70, p=0.0418  |  |  |   |   |   |
| PSMB9     | 2.47 | Proteasome subunit Beta 9                    | Immune response   | U, FC=3.32, p=0.00    | U, FC=1.62, p=0.0002  |  |  |   | U | U |
| SLC2A3    | 2.45 | Solute Carrier Family 2 Member 3             | Metabolism        | NS, FC=1.14, p=0.084  | NS, FC=1.08, FC=0.13  |  |  |   |   | D |
| HLA-F     | 2.43 | Major Histocompatibility Complex, Class I, F | Immune response   | U, FC=2.28, p=0.001   | U, FS=2.19, p=0.0001  |  |  | U | U | U |
| GYG2      | 2.25 | Glycogenin 2                                 | Enzyme            | NS, FC=1.10, p=0.251  | NS, FC=1.03, p=0.69   |  |  |   | U |   |
| VGF       | 2.23 | VGF Nerve Growth Factor Inducible            | Neuronal function | NS, FC=-1.25, p=0.219 | NS, FC=1.02, p=0.86   |  |  |   |   |   |
| HTRA1     | 2.22 | HtrA serine peptidase 1                      | Enzyme            | NS, FC=1.06, p=0.306  | NS, FC=1.04, p=0.57   |  |  |   |   |   |

|          |       |                                               |                 |                      |                      |   |   |   |   |
|----------|-------|-----------------------------------------------|-----------------|----------------------|----------------------|---|---|---|---|
| ZC3HAV1  | 2.2   | Zinc Finger CCCH-Type Containing, Antiviral 1 | Immune response | NS, FC=1.18, p=0.093 | U, FC=1.16, p=0.037  | U | U | U |   |
| PARP9    | 2.16  | Poly(ADP-Ribose) Polymerase Family Member 9   | Immune response | U, FC=1.68, p=0.019  | U, FC=1.81, p=0.0002 | U | U | U | U |
| PSRC1    | 2.08  | Proline and Serine Rich Coiled-Coil 1         | Metabolism      | NS, FC=1.15, p=0.358 | NS, FC=1.15, p=0.13  | U | U |   |   |
| SERPINB6 | 2.06  | Serpin Family B Member 6                      | Metabolism      | NC, FC=1.07, p=0.036 | U, FC=1.26, p=0.0035 | U |   |   |   |
| SPRYD5   | -2.07 | Tripartite Motif-Containing (TRIM) 51         | TRIM protein    | NS, FC=-1.04, p=0.37 | NS, FC=-1.33, p=0.90 |   |   |   |   |
| TRIM48   | -2.3  | Tripartite Motif-Containing (TRIM) 48         | TRIM protein    | NS, FC=-1.01, p=0.92 | NS, FC=-1.0, p=0.39  |   |   |   |   |

Genes differentially expressed in HIV-exposed hNP1 cultures and with |FC| values of 2.0 or more were compared to gene expression data from five published studies that investigated HIV exposure and infection of neural cells and tissues. The genes that are differentially expressed in the other studies but not in the hNP1-derived gene list are not included. In the data listed under Geffin et. al., are changes in gene expression that result from HIV exposure of differentiating human neuroepithelial progenitor cells (NEP) compared to untreated NEP. The gene expression data is stratified according to NEP that had only the apolipoprotein E (ApoE) E3/E3 genotype versus NEP that included both ApoE3/E3 and ApoE3/E4 genotypes. The data that is presented is from the microarray-generated data base of the Geffin et al, 2013 study; these are gene expression values that were analyzed but not published. Data under Roberts et. al., are genes differentially regulated in the frontal lobe of SIV-infected macaques with encephalitis as compared to uninfected macaques. Masliah et al describes differences of gene expression in autopsied brains of infected vs non-infected individuals. Borbajabad et. al. studied gene expression in brains of individuals treated and not treated with anti-retroviral therapy. Listed are the comparisons of gene expression in brains tissues of untreated individuals with HAND as compared to uninfected controls. Data under Gelman et. al., are the genes differentially expressed in tissues from 3 brain regions in HIV-infected individuals with neurocognitive impairment and HIV encephalitis as compared to tissues from the same brain regions from uninfected individuals

U upregulated in this study, D downregulated in this study

Yellow highlight: Differentially regulated with |FC|>1.5 P<0.05

Blue highlight: Differentially regulated with |FC|>1.2 P<0.05

**Table S4 Differentially expressed genes in pairwise comparisons of Mock vs Unt, HIV vs Unt and HIV vs Mock, in the presence of 10nM FTY720-P**

Differentially expressed genes in pairwise comparisons of Mock vs Unt, HIV vs Unt and HIV vs Mock, in the presence of FTY720-P

NOTE: For all the analyses, repeated probes, non coding RNA, withdrawn genes and pseudogenes were removed

Expression values for antisense RNA, and for uncharacterized genes were kept

**FC absolute value  $\geq 1.5$  and nominal p value  $\leq 0.05$**

| Mock vs Unt - with FTY720-P |             |                    | HIV vs Unt - with FTY720-P |          |                    | HIV vs Mock - with FTY720-P |          |                    | Unique to Mock<br>vs Unt | Unique to HIV vs<br>Unt | Common<br>to both |
|-----------------------------|-------------|--------------------|----------------------------|----------|--------------------|-----------------------------|----------|--------------------|--------------------------|-------------------------|-------------------|
| Gene                        | Fold Change | Nominal p<br>value | Gene                       | FC value | Nominal p<br>value | Gene                        | FC value | Nominal p<br>value |                          |                         |                   |
| A2M                         | 7.2657      | 0                  | A2M                        | 4.7322   | 0.4072             | C21ORF24                    | 1.5485   | 0.0481             | ADA                      | AP2B1                   | A2M               |
| ADA                         | 1.5241      | 0.0008             | ADM                        | 3.5551   | 0.7388             | CAPZB                       | -1.5783  | 0.0094             | AK3L1                    | ARHGFE6                 | ADM               |
| ADM                         | 3.9414      | 0.0115             | ALDOA                      | 2.1877   | 0.4449             | CATSPER2                    | 1.5024   | 0.0442             | ALPP                     | BCKDHA                  | ALDOA             |
| AK3L1                       | 1.6711      | 0.006              | ALDOC                      | 2.998    | 0.38               | HLA-A                       | 1.6016   | 0.0133             | ANKRD20A1                | C8ORF13                 | ALDOC             |
| ALDOA                       | 2.0984      | 0.0013             | ALPK2                      | 5.2758   | 0.3542             | HLA-B                       | 1.8217   | 0.0048             | ARRDC4                   | CAPZB                   | ALPK2             |
| ALDOC                       | 3.0076      | 0.0001             | ANKRD37                    | 1.7188   | 0.5287             | OCIAD1                      | 1.5899   | 0.0115             | BAALC                    | DTD1                    | ANKRD37           |
| ALPK2                       | 5.5056      | 0                  | AP2B1                      | -1.5313  | 0.7425             | PALM                        | 1.9108   | 0.001              | BCL3                     | ERH                     | B2M               |
| ALPP                        | -1.653      | 0.0025             | ARHGFE6                    | -1.5183  | 0.6351             | SLC39A1                     | -1.6235  | 0.0013             | BHLHB2                   | FLJ35801                | BCAT1             |
| ANKRD20A1                   | -1.6778     | 0.0053             | B2M                        | 4.9031   | 0.2422             | STAT1                       | 1.756    | 0.0457             | BLZF1                    | HLA-A29.1               | BCL6              |
| ANKRD37                     | 1.7605      | 0.0007             | BCAT1                      | 1.6865   | 0.5813             | TAF15                       | -1.848   | 0.0132             | C14ORF153                | HLA-B                   | BNIP3             |
| ARRDC4                      | 1.6262      | 0.0059             | BCKDHA                     | 1.5396   | 0.7831             | TAP1                        | 2.9136   | 0.0217             | C14ORF85                 | HLA-F                   | C12ORF69          |
| B2M                         | 3.6721      | 0.0001             | BCL6                       | 1.6202   | 0.2362             | WDR5                        | 1.5041   | 0.0033             | C15ORF63                 | KIFC1                   | C1QTNF6           |
| BAALC                       | 1.589       | 0.0109             | BNIP3                      | 3.9014   | 0.2422             | ZNF629                      | 1.6209   | 0.0028             | C21ORF62                 | LEF1                    | C2ORF80           |
| BCAT1                       | 1.663       | 0.0029             | C12ORF69                   | -1.8115  | 0.5796             | ZNF682                      | 1.5068   | 0.0321             | C8ORF45                  | LMNB1                   | CAPN5             |
| BCL3                        | 1.7433      | 0.0021             | C1QTNF6                    | 2.0108   | 0.4072             |                             |          |                    | C9ORF80                  | LOC100008589            | CDK6              |
| BCL6                        | 1.7452      | 0                  | C2ORF80                    | 1.6548   | 0.2362             |                             |          |                    | CA2                      | LOC338758               | CRY1              |
| BHLHB2                      | 2.1962      | 0.0063             | C8ORF13                    | 3.2673   | 0.3423             |                             |          |                    | CDKN2AIPNL               | PALM                    | CXCR7             |
| BLZF1                       | -1.6522     | 0.0117             | CAPN5                      | 1.7692   | 0.5228             |                             |          |                    | CEBPD                    | PSMB8                   | DDIT4             |
| BNIP3                       | 4.123       | 0.0002             | CAPZB                      | -1.5847  | 0.5606             |                             |          |                    | CHRNAS                   | PSMD3                   | ELMOD1            |
| C12ORF69                    | -1.5674     | 0.032              | CDK6                       | -1.7457  | 0.6103             |                             |          |                    | CNTNAP1                  | PTRF                    | ENC1              |
| C14ORF153                   | -1.5319     | 0.0015             | CRY1                       | 1.6903   | 0.6383             |                             |          |                    | COL1A2                   | RBM39                   | ENO1              |
| C14ORF85                    | -1.5116     | 0.0299             | CXCR7                      | 1.9945   | 0.5489             |                             |          |                    | CREB1                    | SPAG16                  | ENO2              |
| C15ORF63                    | -1.6295     | 0.0034             | DDIT4                      | 1.8296   | 0.662              |                             |          |                    | CSF2RA                   | TAF15                   | FAM162A           |
| C1QTNF6                     | 2.2352      | 0.0005             | DTD1                       | 1.684    | 0.5776             |                             |          |                    | CTDSP2                   |                         | FAM46A            |
| C21ORF62                    | 1.5448      | 0.0024             | ELMOD1                     | 2.7494   | 0.3423             |                             |          |                    | CYR61                    |                         | FLRT3             |
| C2ORF80                     | 1.9976      | 0.0001             | ENC1                       | -1.5213  | 0.5287             |                             |          |                    | DACT2                    |                         | FXYD5             |
| C8ORF45                     | -1.6612     | 0.0225             | ENO1                       | 1.8474   | 0.2362             |                             |          |                    | DDX51                    |                         | GYG2              |
| C9ORF80                     | -1.5296     | 0.0374             | ENO2                       | 1.7725   | 0.5083             |                             |          |                    | DEM1                     |                         | HK1               |
| CA2                         | 1.6528      | 0.0067             | ERH                        | -1.5219  | 0.7113             |                             |          |                    | DMC1                     |                         | HK2               |
| CAPN5                       | 1.7316      | 0.0022             | FAM162A                    | 1.7706   | 0.5324             |                             |          |                    | DOK5                     |                         | HLA-A             |
| CDK6                        | -2.0527     | 0.009              | FAM46A                     | 2.5217   | 0.2422             |                             |          |                    | DPY19L1                  |                         | HLA-E             |
| CDKN2AIPNL                  | -1.6529     | 0.0257             | FLJ35801                   | -1.5282  | 0.6851             |                             |          |                    | DUSP19                   |                         | HS.489254         |
| CEBPD                       | 1.5309      | 0.0044             | FLRT3                      | -1.601   | 0.7831             |                             |          |                    | DUXAP3                   |                         | HS3ST3A1          |
| CHRNAS                      | -1.6407     | 0.0021             | FXYD5                      | 1.6876   | 0.5083             |                             |          |                    | EBPL                     |                         | HSPB1             |
|                             |             |                    |                            |          |                    |                             |          |                    | EFNA1                    |                         | HTRA1             |

|          |         |        |             |         |        |              |              |
|----------|---------|--------|-------------|---------|--------|--------------|--------------|
| CNTNAP1  | 1.5263  | 0.0165 | GYG2        | 1.6306  | 0.3202 | EID2B        | ID3          |
| COL1A2   | 1.621   | 0.003  | HK1         | 1.5117  | 0.6567 | EPHA4        | IDH1         |
| CREB1    | -1.5849 | 0.0118 | HK2         | 2.0146  | 0.4723 | FABP5        | IFI6         |
| CRY1     | 1.7975  | 0.0008 | HLA-A       | 2.6952  | 0.5207 | FABP5L2      | IFITM1       |
| CSF2RA   | -1.5267 | 0.0054 | HLA-A29.1   | 2.1404  | 0.6351 | FAM115A      | IFITM2       |
| CTDSP2   | 1.6178  | 0.0173 | HLA-B       | 2.4434  | 0.4723 | FAM167A      | IFITM3       |
| CXCR7    | 2.1824  | 0      | HLA-E       | 2.2059  | 0.5813 | FAM175A      | IGDCC4       |
| CYR61    | -1.6944 | 0.0145 | HLA-F       | 2.3966  | 0.5796 | FBXO32       | IGFBP2       |
| DACT2    | 1.6502  | 0.007  | HS.489254   | 1.7608  | 0.5134 | FKBP14       | IGFBP5       |
| DDIT4    | 1.9579  | 0.0201 | HS3ST3A1    | 1.5619  | 0.6334 | FLJ44124     | IL13RA1      |
| DDX51    | -1.7448 | 0.0034 | HSPB1       | 1.6079  | 0.4723 | FLJ46309     | INSIG2       |
| DEM1     | -1.5023 | 0.0182 | HTRA1       | 2.7397  | 0.3542 | FMN2         | IRF1         |
| DMC1     | -1.5591 | 0.0038 | ID3         | 2.8935  | 0.3542 | FRAS1        | IRF9         |
| DOK5     | -1.5493 | 0.0006 | IDH1        | 1.6352  | 0.6103 | GAS2L3       | ISG15        |
| DPY19L1  | 1.5808  | 0.0022 | IFI6        | 1.7802  | 0.2362 | GRIPAP1      | KBTBD8       |
| DUSP19   | -1.6888 | 0.0081 | IFITM1      | 3.8248  | 0.5184 | GRM3         | KCNIP4       |
| DUXAP3   | -1.5709 | 0.0235 | IFITM2      | 2.4071  | 0.4327 | HCG2P7       | LARGE        |
| EBPL     | 1.5552  | 0.0049 | IFITM3      | 3.5633  | 0.2422 | HIATL2       | LDHA         |
| EFNA1    | 1.6075  | 0.0005 | IGDCC4      | 1.5342  | 0.5861 | HNRNPU       | LGALS3BP     |
| EID2B    | -1.5698 | 0.0045 | IGFBP2      | 1.533   | 0.794  | HRASLS3      | LOC100134006 |
| ELMOD1   | 3.8597  | 0.0001 | IGFBP5      | 1.954   | 0.5364 | HRC          | LOC399939    |
| ENC1     | -1.5496 | 0.0013 | IL13RA1     | 1.9477  | 0.4072 | HS.10862     | LOC653111    |
| ENO1     | 1.584   | 0.0121 | INSIG2      | 1.5181  | 0.2362 | HS.544637    | LOC729384    |
| ENO2     | 1.6421  | 0.0355 | IRF1        | 1.9721  | 0.6705 | HS.551847    | MEGF10       |
| EPHA4    | -1.6332 | 0.0127 | IRF9        | 3.0936  | 0.5207 | HSD17B11     | MGC4677      |
| FABP5    | 1.543   | 0.0077 | ISG15       | 2.3579  | 0.6959 | HSPC268      | MIF          |
| FABP5L2  | 1.5454  | 0.0025 | KBTBD8      | 1.8573  | 0.4449 | IFI16        | MOBKL2B      |
| FAM115A  | -1.6009 | 0.0101 | KCNIP4      | 5.849   | 0.2422 | INSM2        | MTP18        |
| FAM162A  | 1.9557  | 0.0191 | KIFC1       | -1.5218 | 0.4449 | JMJD1A       | NEUROG2      |
| FAM167A  | 3.8058  | 0.0005 | LARGE       | -1.5117 | 0.4723 | KCNH6        | NKX6-2       |
| FAM175A  | -1.6283 | 0.0216 | LDHA        | 2.1265  | 0.6013 | LGI2         | NPPC         |
| FAM46A   | 2.2072  | 0.0022 | LEF1        | -1.5049 | 0.4723 | LIMCH1       | P4HA1        |
| FBXO32   | 1.6354  | 0.0069 | LGALS3BP    | 1.8479  | 0.2422 | LOC100128098 | PARP9        |
| FKBP14   | -1.5969 | 0.0243 | LMNB1       | -1.5705 | 0.4327 | LOC100128505 | PDE1A        |
| FLJ44124 | -1.6102 | 0.0287 | LOC10000851 | -2.781  | 0.5083 | LOC100190938 | PEG10        |
| FLJ46309 | -1.5248 | 0.0161 | LOC10013401 | -1.8275 | 0.6567 | LOC202781    | PFKFB3       |
| FLRT3    | -1.5228 | 0.0399 | LOC338758   | -1.5133 | 0.7644 | LOC255783    | PFKFB4       |
| FMN2     | 1.5847  | 0.0008 | LOC399939   | -1.9858 | 0.3202 | LOC399900    | PFKP         |
| FRAS1    | -1.5404 | 0.0001 | LOC653111   | -1.7108 | 0.4984 | LOC401098    | PGAM1        |
| FXYD5    | 1.5469  | 0.0018 | LOC729384   | -1.54   | 0.3423 | LOC440934    | PGAM4        |
| GAS2L3   | 1.5649  | 0.0102 | MEGF10      | -1.794  | 0.589  | LOC642362    | PGK1         |
| GRIPAP1  | -1.6711 | 0.0242 | MGC4677     | 1.7292  | 0.7459 | LOC645895    | PHCA         |
| GRM3     | -1.5477 | 0.0232 | MIF         | 1.63    | 0.7117 | LOX          | PLEKHA2      |
| GYG2     | 1.6726  | 0.0088 | MOBKL2B     | 1.6791  | 0.5083 | LRAP         | PLOD2        |
| HCG2P7   | -1.5824 | 0.0069 | MTP18       | 2.0099  | 0.6351 | MCART1       | PON2         |
| HIATL2   | -1.6117 | 0.0429 | NEUROG2     | -1.7712 | 0.6088 | MCM8         | PPP1R14C     |
| HK1      | 1.5034  | 0.0331 | NKX6-2      | 2.141   | 0.2834 | NCRNA00219   | PRPH         |

|              |         |        |          |         |        |          |          |
|--------------|---------|--------|----------|---------|--------|----------|----------|
| HK2          | 2.4524  | 0.0046 | NPPC     | -1.6308 | 0.7212 | NET1     | PRSS23   |
| HLA-A        | 1.6828  | 0.0016 | P4HA1    | 2.4626  | 0.4072 | OCIAD1   | PRSS35   |
| HLA-E        | 1.5359  | 0.0018 | PALM     | 1.9292  | 0.402  | P4HA2    | PSME1    |
| HNRNPU       | -1.6631 | 0.0169 | PARP9    | 1.9444  | 0.5684 | PDE4C    | PSRC1    |
| HRASLS3      | 1.8689  | 0.0048 | PDE1A    | -1.5121 | 0.5489 | PGM1     | RALYL    |
| HRC          | 1.6828  | 0.0061 | PEG10    | 1.5192  | 0.7055 | PI15     | RBMS1    |
| HS.10862     | 1.5849  | 0.0095 | PFKFB3   | 1.9163  | 0.6351 | PIP5K2B  | RHOBTB3  |
| HS.489254    | 1.5289  | 0.0045 | PFKFB4   | 2.514   | 0.6355 | PLAGL1   | RND3     |
| HS.544637    | -1.6535 | 0.0342 | PFKP     | 1.8586  | 0.38   | PLK2     | RNU6-15  |
| HS.551847    | 1.5895  | 0.0272 | PGAM1    | 1.9184  | 0.2362 | PLOD1    | RPL12P6  |
| HS3ST3A1     | 1.8431  | 0.0142 | PGAM4    | 1.8269  | 0.5548 | PNPT1    | RPS29    |
| HSD17B11     | 1.848   | 0.0009 | PGK1     | 2.0037  | 0.5207 | PPP1R3C  | SERPINB6 |
| HSPB1        | 1.9047  | 0      | PHCA     | 1.7905  | 0.4156 | PPP2R2B  | SERPING1 |
| HSPC268      | -1.5497 | 0.0227 | PLEKHA2  | 1.926   | 0.4072 | PROS1    | SLC16A3  |
| HTRA1        | 3.3168  | 0.0005 | PLOD2    | 2.698   | 0.535  | PSMD12   | SLC2A14  |
| ID3          | 2.3943  | 0.0049 | PON2     | 1.6232  | 0.5083 | QRFPR    | SLC2A3   |
| IDH1         | 1.799   | 0.0021 | PPP1R14C | 1.999   | 0      | S1PR3    | SMAD6    |
| IFI16        | 1.5574  | 0.0257 | PRPH     | 1.643   | 0.2362 | SFRP1    | SNCAIP   |
| IFI6         | 1.7423  | 0.0026 | PRSS23   | 2.161   | 0.3202 | SFRP2    | SOCS3    |
| IFITM1       | 5.0905  | 0.0001 | PRSS35   | -1.5207 | 0.4894 | SH3BP4   | SORT1    |
| IFITM2       | 2.4929  | 0.0041 | PSMB8    | 1.5325  | 0.6647 | SHRM     | SOSTDC1  |
| IFITM3       | 3.9743  | 0.0008 | PSMD3    | 1.5014  | 0.4449 | SHROOM4  | SPRYD5   |
| IGDCC4       | 2.0386  | 0.0001 | PSME1    | 1.5678  | 0.6632 | SLC35E1  | STAT1    |
| IGFBP2       | 1.9123  | 0.0124 | PSRC1    | 2.1505  | 0.2362 | SLC44A4  | STC1     |
| IGFBP5       | 2.0441  | 0.0004 | PTRF     | 1.7351  | 0.7551 | SNORD13  | SULF1    |
| IL13RA1      | 2.0657  | 0.0011 | RALYL    | 1.5339  | 0.4723 | STAG3L2  | TAP1     |
| INSIG2       | 1.6591  | 0.0001 | RBM39    | -1.6305 | 0.6532 | SULT1A1  | TMEM158  |
| INSM2        | 1.5623  | 0.0199 | RBMS1    | 1.8447  | 0.6567 | SYT7     | TPI1     |
| IRF1         | 1.6791  | 0      | RHOBTB3  | 1.6031  | 0.7517 | TIAM2    | TPST2    |
| IRF9         | 2.3075  | 0.001  | RND3     | -1.5604 | 0.7057 | TIGA1    | TRIM48   |
| ISG15        | 1.8498  | 0.0001 | RNU6-15  | -1.5543 | 0.4156 | TMEFF2   | VKORC1   |
| JMJD1A       | 1.5161  | 0.0045 | RPL12P6  | 1.5846  | 0.7352 | TNFRSF1A | ZC3HAV1  |
| KBTBD8       | 2.2963  | 0.0003 | RPS29    | 1.6164  | 0.7478 | TSPO     |          |
| KCNH6        | -1.6624 | 0.0046 | SERPINB6 | 2.0819  | 0      | UBE2L6   |          |
| KCNIP4       | 8.0289  | 0      | SERPING1 | 1.5609  | 0.5427 | VGLL3    |          |
| LARGE        | -1.7306 | 0.0012 | SLC16A3  | 1.9673  | 0.6632 | XPNPEP3  |          |
| LDHA         | 2.4813  | 0.0138 | SLC2A14  | 1.5765  | 0.2422 | ZNF483   |          |
| LGALS3BP     | 1.7516  | 0.0001 | SLC2A3   | 3.7218  | 0.2362 | ZNF652   |          |
| LGI2         | -1.5764 | 0      | SMAD6    | 1.8051  | 0.2834 | ZNF69    |          |
| LIMCH1       | -1.6881 | 0.0186 | SNCAIP   | -1.5246 | 0.535  |          |          |
| LOC100128098 | -1.5528 | 0.0289 | SOCS3    | 2.0694  | 0.7425 |          |          |
| LOC100128505 | -1.6507 | 0.0183 | SORT1    | 1.6998  | 0.6088 |          |          |
| LOC100134006 | -1.9003 | 0.0004 | SOSTDC1  | 1.5215  | 0.5629 |          |          |
| LOC100190938 | -1.7066 | 0.0079 | SPAG16   | -1.5168 | 0.6334 |          |          |
| LOC202781    | -1.5904 | 0.0204 | SPRYD5   | -1.8457 | 0.6596 |          |          |
| LOC255783    | 1.6628  | 0.0024 | STAT1    | 2.8999  | 0.583  |          |          |
| LOC399900    | -1.6092 | 0.0076 | STC1     | 1.71    | 0.4449 |          |          |

|            |         |        |         |        |        |
|------------|---------|--------|---------|--------|--------|
| LOC399939  | -1.8869 | 0.0003 | SULF1   | 1.5801 | 0.6148 |
| LOC401098  | -1.5614 | 0.0373 | TAF15   | -1.924 | 0.5861 |
| LOC440934  | -1.7339 | 0.0014 | TAP1    | 5.0343 | 0.6334 |
| LOC642362  | -1.6598 | 0.0025 | TMEM158 | 3.3193 | 0.6052 |
| LOC645895  | -1.5644 | 0.0001 | TP1     | 1.5958 | 0.6286 |
| LOC653111  | -1.8181 | 0.0003 | TPST2   | 1.5709 | 0.6594 |
| LOC729384  | -1.846  | 0.0021 | TRIM48  | -2.071 | 0.3542 |
| LOX        | 1.5471  | 0.0151 | VKORC1  | 1.6016 | 0.6632 |
| LRAP       | -1.6261 | 0.0039 | ZC3HAV1 | 1.996  | 0.4723 |
| MCART1     | -1.787  | 0.0188 |         |        |        |
| MCM8       | -1.6856 | 0.0074 |         |        |        |
| MEGF10     | -1.7751 | 0.0012 |         |        |        |
| MGC4677    | 1.5038  | 0.0002 |         |        |        |
| MIF        | 2.0347  | 0.0051 |         |        |        |
| MOBKL2B    | 1.8753  | 0.0043 |         |        |        |
| MTP18      | 1.9788  | 0.0004 |         |        |        |
| NCRNA00219 | 1.5574  | 0.0006 |         |        |        |
| NET1       | 1.842   | 0      |         |        |        |
| NEUROG2    | -1.9586 | 0.0072 |         |        |        |
| NKX6-2     | 2.506   | 0.0001 |         |        |        |
| NPPC       | -2.0823 | 0.0035 |         |        |        |
| OCIAD1     | -1.7011 | 0.0451 |         |        |        |
| P4HA1      | 2.8741  | 0.0051 |         |        |        |
| P4HA2      | 1.5452  | 0.0361 |         |        |        |
| PARP9      | 1.6915  | 0.0004 |         |        |        |
| PDE1A      | -1.6571 | 0.0028 |         |        |        |
| PDE4C      | -1.6298 | 0.006  |         |        |        |
| PEG10      | 1.7509  | 0.006  |         |        |        |
| PFKFB3     | 1.6569  | 0.0005 |         |        |        |
| PFKFB4     | 2.6541  | 0.0005 |         |        |        |
| PFKP       | 1.6261  | 0.0131 |         |        |        |
| PGAM1      | 2.0047  | 0.0001 |         |        |        |
| PGAM4      | 1.782   | 0.0078 |         |        |        |
| PGK1       | 2.2185  | 0.0008 |         |        |        |
| PGM1       | 1.503   | 0.0122 |         |        |        |
| PHCA       | 1.7202  | 0.0035 |         |        |        |
| PI15       | -1.8066 | 0.0038 |         |        |        |
| PIP5K2B    | -1.5247 | 0.0328 |         |        |        |
| PLAGL1     | -1.5814 | 0.0085 |         |        |        |
| PLEKHA2    | 2.2026  | 0.0028 |         |        |        |
| PLK2       | 1.5303  | 0.0026 |         |        |        |
| PLOD1      | 1.5757  | 0.0026 |         |        |        |
| PLOD2      | 2.5403  | 0.0023 |         |        |        |
| PNPT1      | -1.7258 | 0.0084 |         |        |        |
| PON2       | 1.6422  | 0.0068 |         |        |        |
| PPP1R14C   | 2.566   | 0      |         |        |        |
| PPP1R3C    | 1.558   | 0.0012 |         |        |        |

|          |         |        |
|----------|---------|--------|
| PPP2R2B  | 1.5289  | 0.0005 |
| PROS1    | 1.761   | 0.0063 |
| PRPH     | 2.3095  | 0      |
| PRSS23   | 2.8574  | 0.0001 |
| PRSS35   | -1.5344 | 0.0001 |
| PSMD12   | -1.5215 | 0.0109 |
| PSME1    | 1.5188  | 0.0192 |
| PSRC1    | 2.2651  | 0.0004 |
| QRFPR    | -1.6904 | 0.015  |
| RALYL    | 1.9465  | 0      |
| RBMS1    | 2.0369  | 0.0004 |
| RHOBTB3  | 1.617   | 0.0173 |
| RND3     | -1.6314 | 0.0017 |
| RNU6-15  | -1.5816 | 0.0062 |
| RPL12P6  | 1.6248  | 0.0125 |
| RPS29    | 1.6434  | 0.0098 |
| S1PR3    | -1.6063 | 0.0126 |
| SERPINB6 | 2.2812  | 0      |
| SERPING1 | 1.7698  | 0.008  |
| SFRP1    | 1.5313  | 0.0002 |
| SFRP2    | -1.5815 | 0.0025 |
| SH3BP4   | 1.5662  | 0.0018 |
| SHRM     | -1.5088 | 0.0386 |
| SHROOM4  | -1.6443 | 0.0164 |
| SLC16A3  | 2.2052  | 0.0208 |
| SLC2A14  | 1.7717  | 0.0011 |
| SLC2A3   | 4.4463  | 0.0004 |
| SLC35E1  | -1.5866 | 0.0396 |
| SLC44A4  | -1.5333 | 0.049  |
| SMAD6    | 1.981   | 0.0002 |
| SNCAIP   | -1.6223 | 0.0025 |
| SNORD13  | 1.7369  | 0.0076 |
| SOCS3    | 2.0159  | 0.0016 |
| SORT1    | 1.6236  | 0.003  |
| SOSTDC1  | 1.6669  | 0.001  |
| SPRYD5   | -1.9378 | 0.0003 |
| STAG3L2  | -1.506  | 0.0149 |
| STAT1    | 2.1656  | 0.0018 |
| STC1     | 1.8459  | 0.0022 |
| SULF1    | 1.9506  | 0      |
| SULT1A1  | -1.617  | 0.0448 |
| SYT7     | 1.7476  | 0.0059 |
| TAP1     | 1.7279  | 0.001  |
| TIAM2    | -1.528  | 0.0018 |
| TIGA1    | 1.5106  | 0.0009 |
| TMEFF2   | -1.7552 | 0.0146 |
| TMEM158  | 2.8843  | 0      |

|          |         |        |
|----------|---------|--------|
| TNFRSF1A | 1.5709  | 0.0055 |
| TP11     | 1.8287  | 0.0017 |
| TPST2    | 1.8203  | 0.0055 |
| TRIM48   | -2.0973 | 0      |
| TSPO     | 1.5183  | 0.0026 |
| UBE2L6   | 1.5206  | 0.0034 |
| VGLL3    | -1.5109 | 0.0044 |
| VKORC1   | 1.5687  | 0.0024 |
| XPNPEP3  | -1.6739 | 0.0006 |
| ZC3HAV1  | 1.8523  | 0      |
| ZNF483   | -1.5463 | 0.0185 |
| ZNF652   | -1.537  | 0.0397 |
| ZNF69    | -1.5759 | 0.0087 |



**Table S5 Differentially expressed genes in pairwise comparisons of Mock vs Unt, and HIV vs Unt, in the presence of 10nM FTY720-P**

NOTE: For all the analyses, repeated probes, non coding RNA, withdrawn genes and pseudogenes were removed

Expression values for antisense RNA, and for uncharacterized genes were kept

**FC absolute value  $\geq 2.0$  and nominal p value  $\leq 0.05$** 

| HIV vs Unt +FTY720-P |          |                 | Mock vs Unt +FTY720 |          |                 | Unique to HIV | Unique to Mock | Common to both |
|----------------------|----------|-----------------|---------------------|----------|-----------------|---------------|----------------|----------------|
| Gene                 | FC value | Nominal p value | Gene                | FC value | Nominal p value |               |                |                |
| A2M                  | 4.7322   | 0.001           | A2M                 | 7.2657   | 0               | TAP1          | PPP1R14C       | KCNIP4         |
| ADM                  | 3.5551   | 0.0264          | ADM                 | 3.9414   | 0.0115          | HLA-A         | PRPH           | ALPK2          |
| ALDOA                | 2.1877   | 0.0013          | ALDOA               | 2.0984   | 0.0013          | HLA-B         | KBTBD8         | B2M            |
| ALDOC                | 2.998    | 0.0007          | ALDOC               | 3.0076   | 0.0001          | HLA-F         | SLC16A3        | A2M            |
| ALPK2                | 5.2758   | 0.0006          | ALPK2               | 5.5056   | 0               | ISG15         | PLEKHA2        | BNIP3          |
| B2M                  | 4.9031   | 0.0002          | B2M                 | 3.6721   | 0.0001          | HLA-E         | BHLHB2         | IFITM1         |
| BNIP3                | 3.9014   | 0.0002          | BHLHB2              | 2.1962   | 0.0063          | HLA-A29.1     | CXCR7          | SLC2A3         |
| C1QTNF6              | 2.0108   | 0.0009          | BNIP3               | 4.123    | 0.0002          | MTP18         | IL13RA1        | IFITM3         |
| ELMOD1               | 2.7494   | 0.0005          | C1QTNF6             | 2.2352   | 0.0005          | LOC100008589  | IGFBP5         | ADM            |
| FAM167A              | 3.1516   | 0.0005          | CDK6                | -2.0527  | 0.009           |               | IGDCC4         | TMEM158        |
| FAM46A               | 2.5217   | 0.0002          | CXCR7               | 2.1824   | 0               |               | RBMS1          | FAM167A        |
| HK2                  | 2.0146   | 0.0016          | ELMOD1              | 3.8597   | 0.0001          |               | MIF            | IRF9           |
| HLA-A                | 2.6952   | 0.0028          | FAM167A             | 3.8058   | 0.0005          |               | PGAM1          | ALDOC          |
| HLA-A29.1            | 2.1404   | 0.0085          | FAM46A              | 2.2072   | 0.0022          |               | CDK6           | STAT1          |
| HLA-B                | 2.4434   | 0.0018          | HK2                 | 2.4524   | 0.0046          |               | NPPC           | ID3            |
| HLA-E                | 2.2059   | 0.0048          | HTRA1               | 3.3168   | 0.0005          |               |                | ELMOD1         |
| HLA-F                | 2.3966   | 0.0047          | ID3                 | 2.3943   | 0.0049          |               |                | HTRA1          |
| HTRA1                | 2.7397   | 0.0006          | IFITM1              | 5.0905   | 0.0001          |               |                | PLOD2          |
| ID3                  | 2.8935   | 0.0006          | IFITM2              | 2.4929   | 0.0041          |               |                | FAM46A         |
| IFITM1               | 3.8248   | 0.0027          | IFITM3              | 3.9743   | 0.0008          |               |                | PFKFB4         |
| IFITM2               | 2.4071   | 0.0012          | IGDCC4              | 2.0386   | 0.0001          |               |                | P4HA1          |
| IFITM3               | 3.5633   | 0.0002          | IGFBP5              | 2.0441   | 0.0004          |               |                | IFITM2         |
| IRF9                 | 3.0936   | 0.0028          | IL13RA1             | 2.0657   | 0.0011          |               |                | ALDOA          |
| ISG15                | 2.3579   | 0.016           | IRF9                | 2.3075   | 0.001           |               |                | PRSS23         |
| KCNIP4               | 5.849    | 0.0002          | KBTBD8              | 2.2963   | 0.0003          |               |                | PSRC1          |

|              |        |        |          |         |        |          |
|--------------|--------|--------|----------|---------|--------|----------|
| LDHA         | 2.1265 | 0.0055 | KCNIP4   | 8.0289  | 0      | NKX6-2   |
| LOC100008589 | -2.781 | 0.0024 | LDHA     | 2.4813  | 0.0138 | LDHA     |
| MTP18        | 2.0099 | 0.0086 | MIF      | 2.0347  | 0.0051 | SERPINB6 |
| NKX6-2       | 2.141  | 0.0003 | NKX6-2   | 2.506   | 0.0001 | SOCS3    |
| P4HA1        | 2.4626 | 0.0009 | NPPC     | -2.0823 | 0.0035 | HK2      |
| PFKFB4       | 2.514  | 0.0088 | P4HA1    | 2.8741  | 0.0051 | C1QTNF6  |
| PGK1         | 2.0037 | 0.0028 | PFKFB4   | 2.6541  | 0.0005 | PGK1     |
| PLOD2        | 2.698  | 0.0035 | PGAM1    | 2.0047  | 0.0001 | TRIM48   |
| PRSS23       | 2.161  | 0.0004 | PGK1     | 2.2185  | 0.0008 |          |
| PSRC1        | 2.1505 | 0.0001 | PLEKHA2  | 2.2026  | 0.0028 |          |
| SERPINB6     | 2.0819 | 0      | PLOD2    | 2.5403  | 0.0023 |          |
| SLC2A3       | 3.7218 | 0.0001 | PPP1R14C | 2.566   | 0      |          |
| SOCS3        | 2.0694 | 0.0275 | PRPH     | 2.3095  | 0      |          |
| STAT1        | 2.8999 | 0.0049 | PRSS23   | 2.8574  | 0.0001 |          |
| TAP1         | 5.0343 | 0.0076 | PSRC1    | 2.2651  | 0.0004 |          |
| TMEM158      | 3.3193 | 0.0056 | RBMS1    | 2.0369  | 0.0004 |          |
| TRIM48       | -2.071 | 0.0006 | SERPINB6 | 2.2812  | 0      |          |
|              |        |        | SLC16A3  | 2.2052  | 0.0208 |          |
|              |        |        | SLC2A3   | 4.4463  | 0.0004 |          |
|              |        |        | SOCS3    | 2.0159  | 0.0016 |          |
|              |        |        | STAT1    | 2.1656  | 0.0018 |          |
|              |        |        | TMEM158  | 2.8843  | 0      |          |
|              |        |        | TRIM48   | -2.0973 | 0      |          |

**Table S6 Differentially expressed genes in pairwise comparisons of Mock vs Unt in the presence and absence of 10nM FTY720-P**  
**Mock versus Untreated with FC absolute value > 2.0 and nominal p value <0.05**

| Mock vs Unt no FTY720-P |          |                 | Mock vs Unt +FTY720 |          |                 | Unique to no FTY720-P | Unique to FTY720-P | Common to both |
|-------------------------|----------|-----------------|---------------------|----------|-----------------|-----------------------|--------------------|----------------|
| Gene                    | FC value | Nominal p value | Gene                | FC value | Nominal p value |                       |                    |                |
| KCNIP4                  | 7.1305   | 0.0003          | A2M                 | 7.2657   | 0               | HS3ST3A1              | BNIP3              | KCNIP4         |
| A2M                     | 6.5396   | 0               | ADM                 | 3.9414   | 0.0115          | ISG15                 | P4HA1              | A2M            |
| ALPK2                   | 5.0277   | 0.0011          | ALDOA               | 2.0984   | 0.0013          | TAP1                  | PFKFB4             | ALPK2          |
| IFITM1                  | 4.7562   | 0.0002          | ALDOC               | 3.0076   | 0.0001          | SULF1                 | PLOD2              | IFITM1         |
| B2M                     | 4.0348   | 0.0001          | ALPK2               | 5.5056   | 0               | ZC3HAV1               | LDHA               | B2M            |
| IFITM3                  | 3.7441   | 0.0053          | B2M                 | 3.6721   | 0.0001          | CRCP                  | HK2                | IFITM3         |
| FAM167A                 | 3.6045   | 0               | BHLHB2              | 2.1962   | 0.0063          | RND3                  | ID3                | FAM167A        |
| ELMOD1                  | 3.5279   | 0.0006          | BNIP3               | 4.123    | 0.0002          |                       | KBTBD8             | ELMOD1         |
| TMEM158                 | 3.4331   | 0.0001          | C1QTNF6             | 2.2352   | 0.0005          |                       | PGK1               | TMEM158        |
| SLC2A3                  | 3.3889   | 0.0019          | CDK6                | -2.0527  | 0.009           |                       | SLC16A3            | SLC2A3         |
| ADM                     | 3.2333   | 0.011           | CXCR7               | 2.1824   | 0               |                       | CXCR7              | ADM            |
| IFITM2                  | 2.8637   | 0.0009          | ELMOD1              | 3.8597   | 0.0001          |                       | ALDOA              | IFITM2         |
| HTRA1                   | 2.6796   | 0.0002          | FAM167A             | 3.8058   | 0.0005          |                       | IGFBP5             | HTRA1          |
| NKX6-2                  | 2.4054   | 0.001           | FAM46A              | 2.2072   | 0.0022          |                       | IGDCC4             | NKX6-2         |
| PLEKHA2                 | 2.3799   | 0.0033          | HK2                 | 2.4524   | 0.0046          |                       | RBMS1              | PLEKHA2        |
| PRSS23                  | 2.3574   | 0.0051          | HTRA1               | 3.3168   | 0.0005          |                       | MIF                | PRSS23         |
| SERPINB6                | 2.3447   | 0.0001          | ID3                 | 2.3943   | 0.0049          |                       | SOCS3              | SERPINB6       |
| PPP1R14C                | 2.2475   | 0.0136          | IFITM1              | 5.0905   | 0.0001          |                       | CDK6               | PPP1R14C       |
| IRF9                    | 2.2178   | 0.0011          | IFITM2              | 2.4929   | 0.0041          |                       | TRIM48             | IRF9           |
| HS3ST3A1                | 2.2142   | 0.0089          | IFITM3              | 3.9743   | 0.0008          |                       |                    | PSRC1          |
| PSRC1                   | 2.191    | 0.0099          | IGDCC4              | 2.0386   | 0.0001          |                       |                    | FAM46A         |
| FAM46A                  | 2.1784   | 0.004           | IGFBP5              | 2.0441   | 0.0004          |                       |                    | PGAM1          |
| PGAM1                   | 2.1598   | 0.0152          | IL13RA1             | 2.0657   | 0.0011          |                       |                    | ALDOC          |
| ALDOC                   | 2.1583   | 0.0442          | IRF9                | 2.3075   | 0.001           |                       |                    | C1QTNF6        |
| ISG15                   | 2.1556   | 0.0034          | KBTBD8              | 2.2963   | 0.0003          |                       |                    | BHLHB2         |
| TAP1                    | 2.1155   | 0               | KCNIP4              | 8.0289   | 0               |                       |                    | PRPH           |
| C1QTNF6                 | 2.1006   | 0.0002          | LDHA                | 2.4813   | 0.0138          |                       |                    | IL13RA1        |

|         |         |        |          |         |        |       |
|---------|---------|--------|----------|---------|--------|-------|
| BHLHB2  | 2.0881  | 0.0176 | MIF      | 2.0347  | 0.0051 | STAT1 |
| SULF1   | 2.0796  | 0.0016 | NKX6-2   | 2.506   | 0.0001 | NPPC  |
| ZC3HAV1 | 2.0697  | 0.0007 | NPPC     | -2.0823 | 0.0035 |       |
| PRPH    | 2.0654  | 0.047  | P4HA1    | 2.8741  | 0.0051 |       |
| IL13RA1 | 2.0309  | 0.0001 | PFKFB4   | 2.6541  | 0.0005 |       |
| STAT1   | 2.0168  | 0.0004 | PGAM1    | 2.0047  | 0.0001 |       |
| CRCP    | -2.024  | 0.0165 | PGK1     | 2.2185  | 0.0008 |       |
| RND3    | -2.0557 | 0.0013 | PLEKHA2  | 2.2026  | 0.0028 |       |
| NPPC    | -2.0614 | 0.0024 | PLOD2    | 2.5403  | 0.0023 |       |
|         |         |        | PPP1R14C | 2.566   | 0      |       |
|         |         |        | PRPH     | 2.3095  | 0      |       |
|         |         |        | PRSS23   | 2.8574  | 0.0001 |       |
|         |         |        | PSRC1    | 2.2651  | 0.0004 |       |
|         |         |        | RBMS1    | 2.0369  | 0.0004 |       |
|         |         |        | SERPINB6 | 2.2812  | 0      |       |
|         |         |        | SLC16A3  | 2.2052  | 0.0208 |       |
|         |         |        | SLC2A3   | 4.4463  | 0.0004 |       |
|         |         |        | SOCS3    | 2.0159  | 0.0016 |       |
|         |         |        | STAT1    | 2.1656  | 0.0018 |       |
|         |         |        | TMEM158  | 2.8843  | 0      |       |
|         |         |        | TRIM48   | -2.0973 | 0      |       |

**Table S7 Differentially expressed genes in pairwise comparisons of HIV vs Unt in the presence and absence of 10nM FTY720-P  
HIV versus Untreated with FC absolute value > 2.0 and nominal p value <0.05**

| HIV vs Unt no FTY720-P |          |                 | HIV vs Unt +FTY720-P |          |                 | Unique to no | Unique to    | Common to both |
|------------------------|----------|-----------------|----------------------|----------|-----------------|--------------|--------------|----------------|
| Gene                   | FC value | Nominal p value | Gene                 | FC value | Nominal p value | FTY720-P     | FTY720-P     |                |
| B2M                    | 7.1211   | 0.0002          | A2M                  | 4.7322   | 0.001           | IRF1         | BNIP3        | KCNIP4         |
| A2M                    | 6.7048   | 0.0105          | ADM                  | 3.5551   | 0.0264          | PSMB9        | ADM          | ALPK2          |
| TAP1                   | 6.6548   | 0.0067          | ALDOA                | 2.1877   | 0.0013          | GYG2         | ALDOC        | TAP1           |
| ALPK2                  | 5.849    | 0.0052          | ALDOC                | 2.998    | 0.0007          | VGf          | ID3          | B2M            |
| KCNIP4                 | 5.4885   | 0               | ALPK2                | 5.2758   | 0.0006          | ZC3HAV1      | PLOD2        | A2M            |
| IFITM1                 | 4.1549   | 0.0032          | B2M                  | 4.9031   | 0.0002          | PARP9        | PFKFB4       | IFITM1         |
| TMEM158                | 3.8987   | 0.0096          | BNIP3                | 3.9014   | 0.0002          | SPRYD5       | P4HA1        | SLC2A3         |
| HLA-B                  | 3.6293   | 0.0001          | C1QTNF6              | 2.0108   | 0.0009          |              | ALDOA        | IFITM3         |
| STAT1                  | 3.624    | 0.024           | ELMOD1               | 2.7494   | 0.0005          |              | PRSS23       | TMEM158        |
| FAM167A                | 3.563    | 0.0001          | FAM167A              | 3.1516   | 0.0005          |              | NKX6-2       | FAM167A        |
| IFITM3                 | 3.5539   | 0.0031          | FAM46A               | 2.5217   | 0.0002          |              | LDHA         | IRF9           |
| IRF9                   | 3.2923   | 0.001           | HK2                  | 2.0146   | 0.0016          |              | SOCS3        | STAT1          |
| HLA-A                  | 3.2445   | 0.0001          | HLA-A                | 2.6952   | 0.0028          |              | HK2          | ELMOD1         |
| FAM46A                 | 3.0055   | 0.0073          | HLA-A29.1            | 2.1404   | 0.0085          |              | C1QTNF6      | HTRA1          |
| ELMOD1                 | 2.9402   | 0.0014          | HLA-B                | 2.4434   | 0.0018          |              | MTP18        | HLA-A          |
| ISG15                  | 2.749    | 0.005           | HLA-E                | 2.2059   | 0.0048          |              | PGK1         | FAM46A         |
| IFITM2                 | 2.6421   | 0.0002          | HLA-F                | 2.3966   | 0.0047          |              | LOC100008589 | HLA-B          |
| IRF1                   | 2.5481   | 0.0126          | HTRA1                | 2.7397   | 0.0006          |              |              | IFITM2         |
| HLA-E                  | 2.501    | 0.0045          | ID3                  | 2.8935   | 0.0006          |              |              | HLA-F          |
| HLA-A29.1              | 2.5003   | 0.002           | IFITM1               | 3.8248   | 0.0027          |              |              | ISG15          |
| PSMB9                  | 2.4671   | 0.0367          | IFITM2               | 2.4071   | 0.0012          |              |              | HLA-E          |
| SLC2A3                 | 2.4483   | 0.0443          | IFITM3               | 3.5633   | 0.0002          |              |              | PSRC1          |
| HLA-F                  | 2.4328   | 0.0006          | IRF9                 | 3.0936   | 0.0028          |              |              | HLA-A29.1      |
| GYG2                   | 2.2503   | 0.0142          | ISG15                | 2.3579   | 0.016           |              |              | SERPINB6       |
| VGf                    | 2.2278   | 0.0319          | KCNIP4               | 5.849    | 0.0002          |              |              | TRIM48         |
| HTRA1                  | 2.2216   | 0.001           | LDHA                 | 2.1265   | 0.0055          |              |              |                |
| ZC3HAV1                | 2.2043   | 0.0005          | LOC100008589         | -2.781   | 0.0024          |              |              |                |
| PARP9                  | 2.1567   | 0.0229          | MTP18                | 2.0099   | 0.0086          |              |              |                |

|          |         |        |          |        |        |
|----------|---------|--------|----------|--------|--------|
| PSRC1    | 2.0754  | 0.0144 | NKX6-2   | 2.141  | 0.0003 |
| SERPINB6 | 2.0581  | 0.0001 | P4HA1    | 2.4626 | 0.0009 |
| SPRYD5   | -2.0677 | 0.0085 | PFKFB4   | 2.514  | 0.0088 |
| TRIM48   | -2.3047 | 0.0069 | PGK1     | 2.0037 | 0.0028 |
|          |         |        | PLOD2    | 2.698  | 0.0035 |
|          |         |        | PRSS23   | 2.161  | 0.0004 |
|          |         |        | PSRC1    | 2.1505 | 0.0001 |
|          |         |        | SERPINB6 | 2.0819 | 0      |
|          |         |        | SLC2A3   | 3.7218 | 0.0001 |
|          |         |        | SOCS3    | 2.0694 | 0.0275 |
|          |         |        | STAT1    | 2.8999 | 0.0049 |
|          |         |        | TAP1     | 5.0343 | 0.0076 |
|          |         |        | TMEM158  | 3.3193 | 0.0056 |
|          |         |        | TRIM48   | -2.071 | 0.0006 |

**Table S8 Enrichment analysis report, canonical pathways- Mock vs Unt with and without FTY720-P**

| Enrichment by Pathway Maps |                                                                                    |       |             |           | Mock vs Unt no FTY720-P |           |         |                                                                                  | Mock vs Unt +10 nM FTY720-P |           |         |                                                                                                          |
|----------------------------|------------------------------------------------------------------------------------|-------|-------------|-----------|-------------------------|-----------|---------|----------------------------------------------------------------------------------|-----------------------------|-----------|---------|----------------------------------------------------------------------------------------------------------|
| #                          | Maps                                                                               | Total | min p Value | Min FDR   | p-value                 | FDR       | In Data | Network Objects from Active Data                                                 | p-value                     | FDR       | In Data | Network Objects from Active Data                                                                         |
| 1                          | <a href="#">Glycolysis and gluconeogenesis</a>                                     | 86    | 4.987E-11   | 1.746E-08 | 2.503E-09               | 6.821E-07 | 13      | G3P2, LDHA, TPI1, HXK2, ALDOC, PFKP, GLUT3, PGK1, ENO1, ALDOA, PGAM1, PGAM4, GPI | 4.987E-11                   | 1.746E-08 | 17      | G3P2, LDHA, TPI1, HXK2, HXK1, ALDOC, ENO3, PFKP, GLUT3, PGK1, ENO1, PFKL, ALDOA, PGAM1, PGAM4, ENO2, GPI |
| 2                          | <a href="#">Glycolysis and gluconeogenesis/ Human version</a>                      | 86    | 4.987E-11   | 1.746E-08 | 2.503E-09               | 6.821E-07 | 13      | G3P2, LDHA, TPI1, HXK2, ALDOC, PFKP, GLUT3, PGK1, ENO1, ALDOA, PGAM1, PGAM4, GPI | 4.987E-11                   | 1.746E-08 | 17      | G3P2, LDHA, TPI1, HXK2, HXK1, ALDOC, ENO3, PFKP, GLUT3, PGK1, ENO1, PFKL, ALDOA, PGAM1, PGAM4, ENO2, GPI |
| 3                          | <a href="#">Immune response IFN alpha/beta signaling pathway</a>                   | 24    | 2.668E-06   | 4.720E-04 | 2.668E-06               | 4.720E-04 | 6       | IRF1, IFI6, IRF9, STAT1, IFNAR2, ISG15                                           | 2.584E-05                   | 1.809E-03 | 6       | IRF1, IFI6, IRF9, STAT1, IFNAR2, ISG15                                                                   |
| 4                          | <a href="#">Cell cycle Regulation of G1/S transition (part 1)</a>                  | 38    | 3.464E-06   | 4.720E-04 | 3.464E-06               | 4.720E-04 | 7       | p21, Cyclin D2, TGF-beta 2, PP2A regulatory, Cyclin D1, Cyclin D, CDK6           | 4.564E-05                   | 2.904E-03 | 7       | p21, TGF-beta 2, PP2A regulatory, Cyclin D1, SMAD3, Cyclin D, CDK6                                       |
| 5                          | <a href="#">Immune response Oncostatin M signaling via JAK-Stat in mouse cells</a> | 20    | 8.120E-06   | 1.137E-03 | 3.475E-04               | 1.457E-02 | 4       | Cyclin D1, SOCS3, TIMP1, STAT1                                                   | 8.120E-06                   | 1.137E-03 | 6       | STAT3, VEGF-A, Cyclin D1, SOCS3, TIMP1, STAT1                                                            |
| 6                          | <a href="#">Development YAP/TAZ-mediated co-regulation of transcription</a>        | 56    | 1.188E-05   | 1.164E-03 | 2.831E-03               | 5.510E-02 | 5       | ID3, Cyclin D1, Lef-1, SOX9, CDK6                                                | 1.188E-05                   | 1.164E-03 | 9       | ID3, UFO, VEGF-A, Cyclin D1, Lef-1, SMAD3, CTGF, Cyr61, CDK6                                             |
| 7                          | <a href="#">Immune response IL-6 signaling pathway via JAK/STAT</a>                | 72    | 1.482E-05   | 1.164E-03 | 2.459E-04               | 1.335E-02 | 7       | p21, IRF1, p300, SOCS3, STAT1, C/EBPdelta, CDK6                                  | 1.482E-05                   | 1.164E-03 | 10      | p21, STAT3, IRF1, IRS-1, VEGF-A, SOCS3, STAT1, mTOR, C/EBPdelta, CDK6                                    |
| 8                          | <a href="#">Development Thrombopoietin signaling via JAK-STAT pathway</a>          | 22    | 1.496E-05   | 1.164E-03 | 3.146E-05               | 2.644E-03 | 5       | p21, TAP1 (PSF1), Cyclin D1, SOCS3, STAT1                                        | 1.496E-05                   | 1.164E-03 | 6       | p21, STAT3, TAP1 (PSF1), Cyclin D1, SOCS3, STAT1                                                         |
| 9                          | <a href="#">Immune response Oncostatin M signaling via JAK-Stat in human cells</a> | 22    | 1.496E-05   | 1.164E-03 | 3.146E-05               | 2.644E-03 | 5       | Cyclin D1, SOCS3, TIMP1, STAT1, LIFR                                             | 1.496E-05                   | 1.164E-03 | 6       | STAT3, VEGF-A, Cyclin D1, SOCS3, TIMP1, STAT1                                                            |

|    |                                                           |    |           |           |           |           |   |                                                    |           |           |   |                                                       |
|----|-----------------------------------------------------------|----|-----------|-----------|-----------|-----------|---|----------------------------------------------------|-----------|-----------|---|-------------------------------------------------------|
| 10 | <a href="#">Development_WNT signaling pathway. Part 2</a> | 53 | 3.396E-05 | 2.644E-03 | 3.396E-05 | 2.644E-03 | 7 | CD44, Tcf(Lef), WNT, Cyclin D1, NRCAM, Lef-1, ENC1 | 4.005E-04 | 1.219E-02 | 7 | CD44, Tcf(Lef), VEGF-A, Cyclin D1, NRCAM, Lef-1, ENC1 |
|----|-----------------------------------------------------------|----|-----------|-----------|-----------|-----------|---|----------------------------------------------------|-----------|-----------|---|-------------------------------------------------------|



**Table S9 Enrichment analysis report canonical pathways- HIV vs Unt with and without FTY720-P**

Enrichment by Pathway Maps

| #  | Maps                                                                                   | Total | min p Value | Min FDR   | HIV vs Unt No FTY720-p |           |         |                                                                                                             | HIV vs Unt +10nM FTY720-P |           |         |                                                                                                                          |
|----|----------------------------------------------------------------------------------------|-------|-------------|-----------|------------------------|-----------|---------|-------------------------------------------------------------------------------------------------------------|---------------------------|-----------|---------|--------------------------------------------------------------------------------------------------------------------------|
|    |                                                                                        |       |             |           | p-value                | FDR       | In Data | Network Objects from Active Data                                                                            | p-value                   | FDR       | In Data | Network Objects from Active Data                                                                                         |
| 1  | <a href="#">Glycolysis and gluconeogenesis</a>                                         | 86    | 1.201E-12   | 2.474E-10 | 6.940E-02              | 3.267E-01 | 3       | PFKP, GLUT3, GPI                                                                                            | 1.201E-12                 | 2.474E-10 | 16      | G3P2, PFKP, GLUT3, LDHA, PGK1, TPI1, ENO1, PFKL, ALDOA, PGAM1, HXK2, HXK1, ALDOC, PGAM4, ENO2, ENO3                      |
| 2  | <a href="#">Glycolysis and gluconeogenesis/ Human version</a>                          | 86    | 1.201E-12   | 2.474E-10 | 6.940E-02              | 3.267E-01 | 3       | PFKP, GLUT3, GPI                                                                                            | 1.201E-12                 | 2.474E-10 | 16      | G3P2, PFKP, GLUT3, LDHA, PGK1, TPI1, ENO1, PFKL, ALDOA, PGAM1, HXK2, HXK1, ALDOC, PGAM4, ENO2, ENO3                      |
| 3  | <a href="#">Immune response Antigen presentation by MHC class I, classical pathway</a> | 54    | 1.158E-07   | 4.851E-05 | 1.158E-07              | 4.851E-05 | 8       | Tapasin, MHC Class I alpha chain, MHC class I, PSMB9, TAP1 (PSF1), PSME1, Beta-2-microglobulin, PSMB8(LMP7) | 3.806E-06                 | 3.136E-04 | 8       | MHC Class I alpha chain, PSME2, MHC class I, PA28 (11S regulator), TAP1 (PSF1), PSME1, Beta-2-microglobulin, PSMB8(LMP7) |
| 4  | <a href="#">Immune response IFN alpha/beta signaling pathway</a>                       | 24    | 1.167E-07   | 1.603E-05 | 5.370E-06              | 7.500E-04 | 5       | IRF9, IRF1, IFI6, STAT1, ISG15                                                                              | 1.167E-07                 | 1.603E-05 | 7       | IRF9, IRF1, IFI6, STAT1, IFNAR2, PRMT1, ISG15                                                                            |
| 5  | <a href="#">Development WNT signaling pathway, Part 2</a>                              | 53    | 1.666E-06   | 3.489E-04 | 1.666E-06              | 3.489E-04 | 7       | NRCAM, CD44, Lef-1, Frizzled, Tcf(Lef), WNT, Cyclin D1                                                      | 2.218E-03                 | 3.807E-02 | 5       | NRCAM, Lef-1, ENC1, Tcf(Lef), Cyclin D1                                                                                  |
| 6  | <a href="#">IL-6 signaling in multiple myeloma</a>                                     | 51    | 2.435E-06   | 2.508E-04 | 2.356E-03              | 4.935E-02 | 4       | Cyclin D2, Bcl-6, STAT1, Cyclin D1                                                                          | 2.435E-06                 | 2.508E-04 | 8       | STAT3, Cyclin D2, Bcl-6, p53, STAT1, Mcl-1, Cyclin D1, CDK6                                                              |
| 7  | <a href="#">Fructose metabolism/ Rodent version</a>                                    | 85    | 1.593E-05   | 1.094E-03 | 2.413E-01              | 5.282E-01 | 2       | PFKP, GPI                                                                                                   | 1.593E-05                 | 1.094E-03 | 9       | PFKP, TPI1, PFKL, ALDOA, HXK2, F264, F263, HXK1, ALDOC                                                                   |
| 8  | <a href="#">Immune response Oncostatin M signaling via JAK-Stat in mouse cells</a>     | 20    | 1.905E-05   | 1.121E-03 | 1.301E-03              | 3.893E-02 | 3       | SOCS3, STAT1, Cyclin D1                                                                                     | 1.905E-05                 | 1.121E-03 | 5       | STAT3, SOCS3, TIMP1, STAT1, Cyclin D1                                                                                    |
| 9  | <a href="#">Development Thrombopoietin signaling via JAK-STAT pathway</a>              | 22    | 3.146E-05   | 1.296E-03 | 8.813E-05              | 7.385E-03 | 4       | TAP1 (PSF1), SOCS3, STAT1, Cyclin D1                                                                        | 3.146E-05                 | 1.296E-03 | 5       | STAT3, TAP1 (PSF1), SOCS3, STAT1, Cyclin D1                                                                              |
| 10 | <a href="#">Immune response Oncostatin M signaling via JAK-Stat in human cells</a>     | 22    | 3.146E-05   | 1.296E-03 | 1.729E-03              | 4.479E-02 | 3       | SOCS3, STAT1, Cyclin D1                                                                                     | 3.146E-05                 | 1.296E-03 | 5       | STAT3, SOCS3, TIMP1, STAT1, Cyclin D1                                                                                    |

**Table S10 FC values 10nM FTY720-P vs no FTY720-P in Untreated, Mock-treated and HIV- treated cultures**FC absolute value  $\geq 1.3$  and nominal p value  $\leq 0.05$ 

| FTY720-P vs no FTY720-P - Unt cultures |             |                 | FTY720-P vs no FTY720-P - Mock exposed |             |                 | FTY720-P vs no FTY720-P - HIV exposed |             |                 |
|----------------------------------------|-------------|-----------------|----------------------------------------|-------------|-----------------|---------------------------------------|-------------|-----------------|
| Gene                                   | Fold Change | Nominal p value | Gene                                   | Fold Change | Nominal p value | Gene                                  | Fold Change | Nominal p value |
| FANCG                                  | 1.4145      | 0.0039          | RPL28                                  | 1.3389      | 0.0482          | PALM                                  | 1.8913      | 0.0418          |
| PAFAH1B3                               | 1.3484      | 0.0179          | RPS29                                  | 1.3152      | 0.0396          | DTD1                                  | 1.4715      | 0.0317          |
| LOC391532                              | 1.3066      | 0.0162          | ATPBD4                                 | 1.3041      | 0.0397          | LOC401676                             | 1.4537      | 0.0061          |
| SLC6A8                                 | -1.3042     | 0.0191          | FST                                    | -1.3081     | 0.0313          | GM2A                                  | 1.4405      | 0.0324          |
| LOC100008588                           | -1.3257     | 0.003           | SPP1                                   | -1.3109     | 0.0164          | PAFAH1B3                              | 1.4378      | 0.017           |
| NRP1                                   | -1.3316     | 0.0248          | MCART1                                 | -1.3125     | 0.0031          | RPL14                                 | 1.3958      | 0.0308          |
| C14ORF4                                | -1.3368     | 0.0082          | TMEM158                                | -1.3182     | 0.0195          | LOC654350                             | 1.3941      | 0.035           |
| SC5DL                                  | -1.3428     | 0.0142          | CYP26A1                                | -1.3211     | 0.0444          | TST                                   | 1.3849      | 0.0216          |
| IGFBP3                                 | -1.3756     | 0.0075          | LAMC1                                  | -1.3373     | 0.01            | PTK7                                  | 1.3804      | 0.0209          |
| KIAA0182                               | -1.4044     | 0.0009          | FKBP14                                 | -1.3568     | 0.0291          | PSMD3                                 | 1.3763      | 0.0341          |
| TAGLN                                  | -1.4163     | 0.0021          | THBS1                                  | -1.3568     | 0.0436          | THOC5                                 | 1.3446      | 0.0279          |
| ID2                                    | -1.4213     | 0.0361          | TAGLN                                  | -1.3842     | 0.0038          | LOC100132761                          | 1.3442      | 0.0399          |
| LOC100133565                           | -1.4369     | 0.0228          | VGF                                    | -1.4073     | 0.0354          | LOC729500                             | 1.3422      | 0.0382          |
| TPI1                                   | -1.4497     | 0.0333          | CYP26A1                                | -1.4175     | 0.0181          | SOCS2                                 | 1.3282      | 0.0343          |
| ADM                                    | -1.4861     | 0.0488          | SNF8                                   | -1.4486     | 0.019           | LOC148430                             | 1.3276      | 0.0473          |
| C10RF61                                | -1.4915     | 0.0069          | CYP26A1                                | -1.4546     | 0.0193          | DRD1IP                                | 1.3213      | 0.0498          |
| ID3                                    | -1.5007     | 0.0269          | SPOCK1                                 | -1.4547     | 0.0127          | C17ORF61                              | 1.3212      | 0.0218          |
| ANXA1                                  | -1.5092     | 0.004           | ANXA1                                  | -1.6331     | 0.0154          | HS6ST1                                | 1.3144      | 0.029           |
| FST                                    | -1.5264     | 0.0003          |                                        |             |                 | ATP1A1                                | -1.3008     | 0.0299          |
| ID2                                    | -1.555      | 0.0162          |                                        |             |                 | FST                                   | -1.302      | 0.0147          |
| ID1                                    | -1.5668     | 0.0038          |                                        |             |                 | TKT                                   | -1.3076     | 0.0233          |
| LOC441763                              | -1.7835     | 0.0158          |                                        |             |                 | SF3B3                                 | -1.3108     | 0.0366          |
|                                        |             |                 |                                        |             |                 | C22ORF27                              | -1.3189     | 0.0178          |
|                                        |             |                 |                                        |             |                 | SLC7A5                                | -1.3222     | 0.0059          |
|                                        |             |                 |                                        |             |                 | EML4                                  | -1.3278     | 0.037           |
|                                        |             |                 |                                        |             |                 | RRAGD                                 | -1.3299     | 0.0238          |
|                                        |             |                 |                                        |             |                 | FAM167A                               | -1.3329     | 0.0193          |
|                                        |             |                 |                                        |             |                 | PPP3R1                                | -1.3406     | 0.0047          |
|                                        |             |                 |                                        |             |                 | C19ORF60                              | -1.3445     | 0.0202          |
|                                        |             |                 |                                        |             |                 | ENC1                                  | -1.3459     | 0.0118          |

|              |         |        |
|--------------|---------|--------|
| EEF1B2       | -1.3478 | 0.003  |
| KIFC1        | -1.356  | 0.0036 |
| CHD8         | -1.394  | 0.043  |
| FLJ35801     | -1.4083 | 0.019  |
| HLA-B        | -1.4488 | 0.0226 |
| LMNB1        | -1.4908 | 0.0009 |
| TAF15        | -1.5012 | 0.0333 |
| APP          | -1.532  | 0.0047 |
| AP2B1        | -1.5379 | 0.0243 |
| RBM39        | -1.5647 | 0.0371 |
| TAF15        | -1.5945 | 0.0313 |
| AP2B1        | -1.6203 | 0.0116 |
| LOC100133565 | -2.193  | 0.0363 |
| LOC100008589 | -2.9392 | 0.0227 |

**Table S11 Enrichment analysis report, canonical pathways- 10nM FTY720-P vs no FTY720-P in Untreated, Mock-treated and HIV- treated cultures**

Enrichment by Pathway Maps

| Enrichment by Pathway Maps |                                                                                         |       |             |           | HIV +10nM FTY720-P vs no FTY720-P |           |         |                                  | Mock +10nM FTY720-P vs no FTY720-P |           |         |                                  | Unt +10nM FTY720-P vs no FTY720-P |           |         |                                  |
|----------------------------|-----------------------------------------------------------------------------------------|-------|-------------|-----------|-----------------------------------|-----------|---------|----------------------------------|------------------------------------|-----------|---------|----------------------------------|-----------------------------------|-----------|---------|----------------------------------|
| #                          | Maps                                                                                    | Total | min p Value | Min FDR   | p-value                           | FDR       | In Data | Network Objects from Active Data | p-value                            | FDR       | In Data | Network Objects from Active Data | p-value                           | FDR       | In Data | Network Objects from Active Data |
| 1                          | <a href="#">Development_Transcription factors in segregation of hepatocytic lineage</a> | 30    | 2.450E-02   | 5.777E-02 | 6.890E-02                         | 1.549E-01 | 1       | Follistatin                      | 2.450E-02                          | 5.777E-02 | 1       | Follistatin                      | 3.654E-02                         | 9.594E-02 | 1       | Follistatin                      |
| 2                          | <a href="#">Development_BMP signaling</a>                                               | 33    | 2.693E-02   | 5.777E-02 | 7.553E-02                         | 1.549E-01 | 1       | Follistatin                      | 2.693E-02                          | 5.777E-02 | 1       | Follistatin                      | 4.012E-02                         | 9.594E-02 | 1       | Follistatin                      |
| 3                          | <a href="#">Signal transduction_Activin A signaling regulation</a>                      | 33    | 2.693E-02   | 5.777E-02 | 7.553E-02                         | 1.549E-01 | 1       | Follistatin                      | 2.693E-02                          | 5.777E-02 | 1       | Follistatin                      | 4.012E-02                         | 9.594E-02 | 1       | Follistatin                      |
| 4                          | <a href="#">Reproduction_Gonadotropin-releasing hormone (GnRH) signaling</a>            | 72    | 5.793E-02   | 6.758E-02 | 1.578E-01                         | 1.726E-01 | 1       | Follistatin                      | 5.793E-02                          | 6.758E-02 | 1       | Follistatin                      | 8.564E-02                         | 1.080E-01 | 1       | Follistatin                      |

**Table S12 Enrichment by GO Processes- 10nM FTY720-P vs no FTY720-P in Untreated, Mock-treated and HIV- treated cultures**

| Enrichment by GO Processes |                                                         |       |             |           | HIV +10nM FTY720-P vs no FTY720-P |           |         |                                                                                                                                                                                                                                                                                                                                                                                                                | Mock +10nM FTY720-P vs no FTY720-P |           |         |                                  | Unt +10nM FTY720-P vs no FTY720-P |           |         |                                                |
|----------------------------|---------------------------------------------------------|-------|-------------|-----------|-----------------------------------|-----------|---------|----------------------------------------------------------------------------------------------------------------------------------------------------------------------------------------------------------------------------------------------------------------------------------------------------------------------------------------------------------------------------------------------------------------|------------------------------------|-----------|---------|----------------------------------|-----------------------------------|-----------|---------|------------------------------------------------|
| #                          | Processes                                               | Total | min(pValue) | Min FDR   | p-value                           | FDR       | In Data | Network Objects from Active Data                                                                                                                                                                                                                                                                                                                                                                               | p-value                            | FDR       | In Data | Network Objects from Active Data | p-value                           | FDR       | In Data | Network Objects from Active Data               |
| 1                          | <a href="#">innate immune response</a>                  | 956   | 1.371E-25   | 1.456E-23 | 1.371E-25                         | 1.456E-23 | 31      | HLA-B14, HLA-B40, HLA-B49, HLA-B38, HLA-B42, HLA-B55, HLA-B37, HLA-B46, HLA-B58, HLA-B8, HLA-B81, HLA-B, HLA-B54, HLA-B15, HLA-B52, HLA-B41, HLA-B35, 1B73, APP, HLA-B39, MHC Class I alpha chain, HLA-B57, HLA-B44, HLA-B27, HLA-B51, HLA-B53, HLA-B Cw-5, HLA-B78, HLA-B7, HLA-B13, HLA-B18                                                                                                                  | 5.203E-01                          | 5.675E-01 | 1       | Annexin I                        | 5.203E-01                         | 5.419E-01 | 1       | Annexin I                                      |
| 2                          | <a href="#">response to cytokine</a>                    | 1222  | 6.733E-25   | 6.752E-23 | 6.733E-25                         | 6.752E-23 | 33      | HLA-B14, HLA-B40, SOCS2, HLA-B49, HLA-B38, HLA-B42, HLA-B55, HLA-B37, HLA-B46, HLA-B58, TAFs, HLA-B8, HLA-B81, HLA-B, HLA-B54, HLA-B15, HLA-B52, PSMD3, HLA-B41, HLA-B35, 1B73, HLA-B39, MHC Class I alpha chain, HLA-B57, HLA-B44, HLA-B27, HLA-B51, HLA-B53, HLA-B Cw-5, HLA-B78, HLA-B7, HLA-B13, HLA-B18                                                                                                   | 2.334E-01                          | 3.200E-01 | 2       | Annexin I, Thrombospondin 1      | 6.112E-01                         | 6.260E-01 | 1       | Annexin I                                      |
| 3                          | <a href="#">regulation of immune response</a>           | 1346  | 1.421E-23   | 1.116E-21 | 1.421E-23                         | 1.116E-21 | 33      | HLA-B14, HLA-B40, HLA-B49, HLA-B38, HLA-B42, HLA-B55, HLA-B37, HLA-B46, HLA-B58, HLA-B8, HLA-B81, Calcineurin B (regulatory), HLA-B, HLA-B54, HLA-B15, Calcineurin B1, HLA-B52, PSMD3, HLA-B41, HLA-B35, 1B73, HLA-B39, MHC Class I alpha chain, HLA-B57, HLA-B44, HLA-B27, HLA-B51, HLA-B53, HLA-B Cw-5, HLA-B78, HLA-B7, HLA-B13, HLA-B18                                                                    | 6.478E-01                          | 6.780E-01 | 1       | Annexin I                        | 6.478E-01                         | 6.595E-01 | 1       | Annexin I                                      |
| 4                          | <a href="#">cell surface receptor signaling pathway</a> | 2970  | 8.652E-21   | 6.507E-19 | 8.652E-21                         | 6.507E-19 | 41      | HLA-B14, PTK7, HLA-B40, SOCS2, HLA-B49, HLA-B38, HLA-B42, DDR2, HLA-B55, HLA-B37, HLA-B46, HLA-B58, Follistatin, HLA-B8, HLA-B81, Calcineurin B (regulatory), HLA-B, HLA-B54, HLA-B15, Calcineurin B1, HLA-B52, PSMD3, HLA-B41, HLA-B35, 1B73, Beta-adaptin 2, APP, ATP1A3, HLA-B39, MHC Class I alpha chain, HLA-B57, HLA-B44, HLA-B27, HLA-B51, HLA-B53, HLA-B Cw-5, HLA-B78, CHD8, HLA-B7, HLA-B13, HLA-B18 | 3.902E-01                          | 4.562E-01 | 3       | SGPP1, Annexin I, Follistatin    | 6.198E-02                         | 1.180E-01 | 5       | Neuropilin-1, Annexin I, ID1, Follistatin, IBP |

|   |                                                        |      |           |           |           |           |    |                                                                                                                                                                                                                                                                                                                                                                               |           |           |   |                                                                  |           |           |   |                                                     |
|---|--------------------------------------------------------|------|-----------|-----------|-----------|-----------|----|-------------------------------------------------------------------------------------------------------------------------------------------------------------------------------------------------------------------------------------------------------------------------------------------------------------------------------------------------------------------------------|-----------|-----------|---|------------------------------------------------------------------|-----------|-----------|---|-----------------------------------------------------|
| 5 | <a href="#">cellular response to organic substance</a> | 3023 | 1.686E-20 | 1.217E-18 | 1.686E-20 | 1.217E-18 | 41 | HLA-B14, PTK7, HLA-B40, SOCS2, HLA-B49, RagD, Lamin B1, HLA-B38, HLA-B42, HLA-B55, HLA-B37, HLA-B46, HLA-B58, TAFs, Follistatin, HLA-B8, HLA-B81, HLA-B, HLA-B54, HLA-B15, HLA-B52, Lamin B, PSMD3, HLA-B41, HLA-B35, 1B73, APP, ATP1A3, ATP1A1, HLA-B39, MHC Class I alpha chain, HLA-B57, HLA-B44, HLA-B27, HLA-B51, HLA-B53, HLA-B Cw-5, HLA-B78, HLA-B7, HLA-B13, HLA-B18 | 1.886E-02 | 9.967E-02 | 6 | CYP26A1, CXXC1, Annexin I, Thrombospondin 1, FKBP14, Follistatin | 1.886E-02 | 6.390E-02 | 6 | Neuropilin-1, Annexin I, ID3, ID1, Follistatin, IBP |
| 6 | <a href="#">regulation of immune system process</a>    | 2131 | 1.712E-19 | 1.189E-17 | 1.712E-19 | 1.189E-17 | 35 | HLA-B14, HLA-B40, HLA-B49, HLA-B38, HLA-B42, HLA-B55, HLA-B37, HLA-B46, HLA-B58, HLA-B8, HLA-B81, Calcineurin B (regulatory), HLA-B, HLA-B54, HLA-B15, Calcineurin B1, HLA-B52, PSMD3, FMIP, HLA-B41, HLA-B35, 1B73, Beta-adaptin 2, HLA-B39, MHC Class I alpha chain, HLA-B57, HLA-B44, HLA-B27, HLA-B51, HLA-B53, HLA-B Cw-5, HLA-B78, HLA-B7, HLA-B13, HLA-B18             | 4.854E-01 | 5.381E-01 | 2 | Annexin I, Thrombospondin 1                                      | 2.116E-01 | 2.579E-01 | 3 | Annexin I, ID2, IBP                                 |
| 7 | <a href="#">immune response</a>                        | 1680 | 2.165E-18 | 1.447E-16 | 2.165E-18 | 1.447E-16 | 31 | HLA-B14, HLA-B40, HLA-B49, HLA-B38, HLA-B42, HLA-B55, HLA-B37, HLA-B46, HLA-B58, HLA-B8, HLA-B81, HLA-B, HLA-B54, HLA-B15, HLA-B52, HLA-B41, HLA-B35, 1B73, APP, HLA-B39, MHC Class I alpha chain, HLA-B57, HLA-B44, HLA-B27, HLA-B51, HLA-B53, HLA-B Cw-5, HLA-B78, HLA-B7, HLA-B13, HLA-B18                                                                                 | 3.636E-01 | 4.336E-01 | 2 | Annexin I, Thrombospondin 1                                      | 3.636E-01 | 3.979E-01 | 2 | Annexin I, Adrenomedullin                           |
| 8 | <a href="#">defense response</a>                       | 1948 | 1.422E-17 | 9.169E-16 | 1.422E-17 | 9.169E-16 | 32 | HLA-B14, HLA-B40, HLA-B49, HLA-B38, HLA-B42, HLA-B55, HLA-B37, HLA-B46, HLA-B58, HLA-B8, HLA-B81, Calcineurin B (regulatory), HLA-B, HLA-B54, HLA-B15, HLA-B52, HLA-B41, HLA-B35, 1B73, APP, HLA-B39, MHC Class I alpha chain, HLA-B57, HLA-B44, HLA-B27, HLA-B51, HLA-B53, HLA-B Cw-5, HLA-B78, HLA-B7, HLA-B13, HLA-B18                                                     | 5.271E-02 | 1.480E-01 | 4 | VGF, Osteopontin, Annexin I, Thrombospondin 1                    | 1.759E-01 | 2.241E-01 | 3 | Annexin I, Adrenomedullin, IBP                      |

|    |                                                        |      |           |           |           |           |    |                                                                                                                                                                                                                                                                                                                                                                                      |           |           |   |                                                                                    |           |           |   |                                                                     |
|----|--------------------------------------------------------|------|-----------|-----------|-----------|-----------|----|--------------------------------------------------------------------------------------------------------------------------------------------------------------------------------------------------------------------------------------------------------------------------------------------------------------------------------------------------------------------------------------|-----------|-----------|---|------------------------------------------------------------------------------------|-----------|-----------|---|---------------------------------------------------------------------|
| 9  | <a href="#">cellular response to chemical stimulus</a> | 3629 | 1.521E-17 | 9.470E-16 | 1.521E-17 | 9.470E-16 | 41 | HLA-B14, PTK7, HLA-B40, SOCS2, HLA-B49, RagD, Lamin B1, HLA-B38, HLA-B42, HLA-B55, HLA-B37, HLA-B46, HLA-B58, TAFs, Follistatin, HLA-B8, HLA-B81, HLA-B, HLA-B54, HLA-B15, HLA-B52, Lamin B, PSMD3, HLA-B41, HLA-B35, 1B73, APP, ATP1A3, ATP1A1, HLA-B39, MHC Class I alpha chain, HLA-B57, HLA-B44, HLA-B27, HLA-B51, HLA-B53, HLA-B Cw-5, HLA-B78, HLA-B7, HLA-B13, HLA-B18        | 1.195E-02 | 9.061E-02 | 7 | CYP26A1, Osteopontin, CXXC1, Annexin I, Thrombospondin 1, FKBP14, Follistatin      | 1.195E-02 | 5.179E-02 | 7 | Neuropilin-1, Annexin I, ID3, ID2, ID1, Follistatin, IBP            |
| 10 | <a href="#">response to organic substance</a>          | 4151 | 2.554E-16 | 1.537E-14 | 2.554E-16 | 1.537E-14 | 42 | HLA-B14, PTK7, HLA-B40, SOCS2, HLA-B49, RagD, Lamin B1, HLA-B38, HLA-B42, HLA-B55, HLA-B37, HLA-B46, HLA-B58, TAFs, Follistatin, HLA-B8, HLA-B81, HLA-B, eEF1B, HLA-B54, HLA-B15, HLA-B52, Lamin B, PSMD3, HLA-B41, HLA-B35, 1B73, APP, ATP1A3, ATP1A1, HLA-B39, MHC Class I alpha chain, HLA-B57, HLA-B44, HLA-B27, HLA-B51, HLA-B53, HLA-B Cw-5, HLA-B78, HLA-B7, HLA-B13, HLA-B18 | 6.403E-03 | 8.033E-02 | 8 | VGF, CYP26A1, Osteopontin, CXXC1, Annexin I, Thrombospondin 1, FKBP14, Follistatin | 2.435E-02 | 7.124E-02 | 7 | Neuropilin-1, Annexin I, ID3, ID1, Adrenomedullin, Follistatin, IBP |
